## **A genome-wide almanac of co-essential modules assigns function to uncharacterized genes**

Michael Wainberg<sup>1,2,4</sup>, Roarke A. Kamber<sup>1,4</sup>, Akshay Balsubramani<sup>1,4</sup>, Robin M. Meyers<sup>1</sup>, Nasa Sinnott-Armstrong<sup>1</sup>, Daniel Hornburg<sup>1</sup>, Lihua Jiang<sup>1</sup>, Joanne Chan<sup>1</sup>, Ruiqi Jian<sup>1</sup>, Mingxin Gu<sup>1</sup>, Anna Shcherbina<sup>1</sup>, Michael M. Dubreuil<sup>1</sup>, Kaitlyn Spees<sup>1</sup>, Michael P. Snyder<sup>1</sup>, Anshul Kundaje<sup>1,2\*</sup>, Michael C. Bassik<sup>1,3,\*</sup>

1. Department of Genetics, Stanford University, Stanford, California 94305-5120, USA
2. Department of Computer Science, Stanford University, Stanford, CA, 94305
3. Chemistry, Engineering, and Medicine for Human Health (ChEM-H), Stanford University, Stanford, California 94305-5120, USA.
4. These authors contributed equally

\*Correspondence to [akundaje@stanford.edu](mailto:akundaje@stanford.edu) or [bassik@stanford.edu](mailto:bassik@stanford.edu)

## SUMMARY

1 A central remaining question in the post-genomic era is how genes interact to form biological  
2 pathways. Measurements of gene dependency across hundreds of cell lines have been used to  
3 cluster genes into 'co-essential' pathways, but this approach has been limited by ubiquitous false  
4 positives. Here, we develop a statistical method that enables robust identification of gene co-  
5 essentiality and yields a genome-wide set of functional modules. This almanac recapitulates  
6 diverse pathways and protein complexes and predicts the functions of 102 uncharacterized  
7 genes. Validating top predictions, we show that *TMEM189* encodes plasmanylethanolamine  
8 desaturase, the long-sought key enzyme for plasmalogen synthesis. We also show that *C15orf57*  
9 binds the AP2 complex, localizes to clathrin-coated pits, and enables efficient transferrin uptake.  
10 Finally, we provide an interactive web tool for the community to explore the results  
11 (coessentiality.net). Our results establish co-essentiality profiling as a powerful resource for  
12 biological pathway identification and discovery of novel gene functions.

## 13 INTRODUCTION

14 A fundamental and still largely unresolved question in biology is how finite numbers of genes  
15 generate the vast phenotypic complexity of cells and organisms (Barabási and Oltvai, 2004;  
16 Chuang et al., 2010). With the understanding that modules of interacting genes represent a key  
17 layer of biological organization, the complete identification of such functional modules and their  
18 constituent genes has emerged as a central goal of systems biology (Costanzo et al., 2016;  
19 Hartwell et al., 1999; Horlbeck et al., 2018; Stuart et al., 2003). However, efforts to map genetic  
20 interactions and biological modules at genome scale have been hindered by the enormous  
21 number of possible gene-gene interactions: assaying all pairs of genetic interactions among the  
22 approximately 20,000 human genes (Harrow et al., 2012) would require 200 million distinct  
23 readouts. Furthermore, despite substantial progress in elucidating the functions of individual  
24 genes in recent decades through both targeted studies and unbiased approaches (Alonso and  
25 Ecker, 2006; Carpenter and Sabatini, 2004; Mohr et al., 2014; Shalem et al., 2015), hundreds of  
26 human genes remain functionally uncharacterized.

27  
28 Pioneering work in yeast measured pairwise genetic interactions in high throughput by quantifying  
29 the fitness of double knockout strains (Tong, 2004; Tong et al., 2001); more recently, this work  
30 has been extended into a genome-wide map of yeast genetic interactions and modules (Costanzo  
31 et al., 2010, 2016). In human cells, which unlike yeast cannot be crossed to generate double-  
32 knockout mutants, a key advance towards genetic interaction mapping has been the development  
33 of genome-scale CRISPR/Cas9 and RNAi screens (Mohr et al., 2014; Shalem et al., 2015) which  
34 have been repurposed to perform pairs of perturbations (Bassik et al., 2013; Boettcher et al.,  
35 2018; Du et al., 2017; Han et al., 2017; Horlbeck et al., 2018; Rosenbluh et al., 2016; Shen et al.,  
36 2017). Yet despite considerable successes, double-perturbation genetic interaction mapping is  
37 inherently limited by the combinatorial explosion of gene pairs, with the largest human genetic  
38 interaction map to date (Horlbeck et al., 2018) having only assayed 222,784 gene pairs, or ~0.1%

39 of all possible genetic interactions, thus far precluding the generation of a genome-wide map of  
40 functional modules in human cells.

41  
42 A complementary approach that circumvents this limitation is to measure the fitness of single-  
43 gene perturbations across multiple conditions, and map putative functional interactions by  
44 correlating the resulting phenotypic profiles (**Figure S1A**), referred to as co-essentiality mapping.  
45 Both co-essentiality mapping and genetic interaction mapping measure gene essentiality across  
46 many different genetic backgrounds, but whereas the background for genetic interaction mapping  
47 is the knockout of a single partner gene, for co-essentiality mapping it is the mutational and  
48 transcriptional profile of a cell line. Co-essentiality mapping across diverse cancer cell lines has  
49 recently been used to group genes into pathways and in some cases has identified novel gene  
50 functions (Boyle et al., 2018; Kim et al., 2019; McDonald et al., 2017; Pan et al., 2018; Rauscher  
51 et al., 2018; Wang et al., 2017).

52  
53 Co-essentiality mapping, however, has its own fundamental limitation: unlike double-perturbation  
54 mapping, where each pair of gene knockouts is independent, measurements in two different cell  
55 lines may be strongly related, for instance because some pairs of cell lines are derived from the  
56 same tissue or lineage. Existing approaches fail to account for violations of independence, leading  
57 to inflated  $p$ -values, incorrect determinations of statistical significance, and an inability to identify  
58 gene co-essentiality relationships in a robust, systematic manner (**Figure S1B**). In this study, we  
59 address this critical limitation of co-essentiality mapping with a novel statistical method that  
60 explicitly accounts for the non-independence of cell lines. We apply the method to a dataset of  
61 genome-wide CRISPR screens in 485 diverse cancer cell lines (Tsherniak et al., 2017) and find  
62 significantly improved enrichment for known pathway interactions and protein complexes.

63



64 We find that these analytical advances greatly improve our ability to detect *bona fide* functional  
65 modules. We generate a genome-wide almanac of co-essential modules, which both recapitulate  
66 diverse known pathways and protein complexes and nominate putative functions for 102 poorly  
67 characterized genes. We experimentally validate two such genes: we identify *TMEM189* as the  
68 gene encoding the plasmalyethanolamine desaturase (PEDS) orphan enzyme required for  
69 synthesis of plasmalogen lipids, one of the most abundant lipid classes in the human body; and  
70 we discover a role for *C15orf57* in regulating clathrin-mediated endocytosis. Finally, to accelerate  
71 further biological discovery using this resource, we present an interactive web tool that enables  
72 visualization and analysis of co-essential gene pairs and modules.

## 73 RESULTS

### 74 A genome-wide map of co-essential interactions

75 To map co-essential interactions across compendia of genome-wide screens while accounting  
76 for non-independence of cell lines, we devised a novel approach based on generalized least  
77 squares (GLS), a classic statistical technique (Aitkin, 1935) (see Methods). We applied the  
78 approach (**Figure 1A**) to a dataset of CRISPR screens in 485 cell lines from the Achilles project  
79 (Tsherniak et al., 2017), with gene-level essentiality scores corrected for copy number and guide  
80 efficacy using the CERES algorithm (Meyers et al., 2017). We noted the remarkably effective  
81 statistical calibration of the method. Since the percentage of gene pairs expected to have  
82 detectable functional interactions is much less than 50% (Horlbeck et al., 2018), the median  $p$ -  
83 value across gene pairs ought to be very close to 0.5 for a well-calibrated method. Indeed, we  
84 found that the median GLS  $p$ -value was 0.48, indicating near-perfect calibration, while the median  
85 Pearson correlation  $p$ -value on the same dataset was 0.21, indicating substantial inflation and  
86 false-positive co-essential gene pairs (**Figure 1B**). We provide each gene's significant co-  
87 essential interactors at a false discovery rate of 10% (**Table S1**).

88  
89 Even while correcting for  $p$ -value inflation, GLS still has substantial power to detect co-essential  
90 interactions. Around 80% of genes have at least one co-essential partner at 10% FDR (**Figure**  
91 **S2**), and 40% of genes have at least ten partners: in all, we detect 93,575 significant co-essential  
92 gene pairs. 99.4% of all partners are positively correlated, with the remaining 0.6% negatively  
93 correlated. We noted that in many cases, negative correlations occur when one gene negatively  
94 regulates the other: for instance, *TP53* is negatively correlated with *MDM2* ( $p = 1 \times 10^{-12}$ ), which  
95 ubiquitinates p53 to mark it for degradation (Moll and Petrenko, 2003); *HER2* is negatively  
96 correlated with *PHLDA2* ( $p = 5 \times 10^{-6}$ ), which was recently shown to inhibit *HER2* signaling (Wang  
97 et al., 2018); and *MAPK1* is negatively correlated with *DUSP6* ( $p = 2 \times 10^{-6}$ ), a phosphatase that  
98 inactivates several MAP kinases including MAPK1 (Furukawa et al., 2008). A second class of

99 negative correlation arises from genes with similar functions that are active in mutually exclusive  
100 cell types, such as *MYC* and *MYCN* ( $p = 3 \times 10^{-11}$ ) (Rickman et al., 2018).

101  
102 Crucially, even though more essential genes tend to have more partners, 70% of the 10% least  
103 essential genes have at least one partner at 10% FDR, and nearly half of these least essential  
104 genes have at least one partner at 1% FDR (**Figure S2**). This suggests that, rather than being  
105 limited to detecting interactions among only strongly essential genes, the focus of previous co-  
106 essentiality mapping efforts (Kim et al., 2019), co-essentiality is a genome-wide tool for pathway  
107 mapping.

108  
109 We developed a method to visualize genes in a genome-wide interaction map based on their co-  
110 essentiality profiles by placing more strongly co-essential gene pairs closer together, inspired by  
111 similar visualizations based on yeast genetic interaction maps (Costanzo et al., 2010, 2016). We  
112 found that naive application of dimensionality reduction techniques such as Principal Component  
113 Analysis (PCA) and Uniform Manifold Approximation and Projection (UMAP) (McInnes et al.,  
114 2018) failed to effectively expose functional relationships between genes due to difficulty modeling  
115 the multi-scale nature of the co-essentiality network; previous attempts at visualizing co-  
116 essentiality networks (e.g. McDonald et al., 2017) also suffer from a similar lack of discernible  
117 structure. Instead, we first applied diffusion maps (Coifman and Lafon, 2006), a technique from  
118 spectral graph theory, to separate coarse- and fine-scale components before applying UMAP (see  
119 Methods). To further improve the layout, we incorporated module membership (defined below)  
120 into the diffusion map in addition to pairwise co-essentiality. To showcase the power of this  
121 approach, we manually annotated 39 'neighborhoods' within the interaction map highly enriched  
122 for a particular pathway or complex (**Figure 1C, D**); collectively, these pathways and complexes  
123 encompass many of the major aspects of cell biology.

124

## 125 **Co-essentiality complements co-expression in mapping biological pathways**

126 We next investigated whether the improved calibration of GLS translated into improved  
127 prioritization of co-functional gene pairs. To do this, we used an established benchmarking  
128 strategy (Pan et al., 2018) to measure how accurately GLS could recall the top 1 to 10 interaction  
129 partners of each gene when compared with Pearson correlation. The performance was measured  
130 using three databases of interactors previously benchmarked in Pan et al.: CORUM, a manually  
131 curated protein complex database (Ruepp et al., 2008); hu.MAP, a database of protein-protein  
132 interactions detected by mass spectrometry experiments (Drew et al., 2017); and STRING, a  
133 database of co-functional interactions integrating multiple sources of direct and indirect evidence  
134 (Szklarczyk et al., 2017). We found that GLS consistently prioritized genes more effectively than  
135 several other methods, including Pearson correlation bias-corrected with PCA using olfactory  
136 receptor genes as a gold-standard negative set (Boyle et al., 2018), across all three databases  
137 and across a wide variety of rank thresholds (**Figure 2A**). For instance, the top-ranked partners  
138 for each gene are approximately 160-fold enriched for CORUM interactions for GLS compared to  
139 120-fold for bias-corrected Pearson correlation; for hu.MAP, 130-fold versus 90-fold enriched;  
140 and for STRING, 7.5-fold versus 5.5-fold enriched. Remarkably, failing to perform PCA-based  
141 bias correction significantly degrades the performance of Pearson correlation but not GLS,  
142 suggesting that GLS is able to automatically perform bias correction without requiring a putatively  
143 non-essential gene set like olfactory receptors.

144  
145 We also compared co-essentiality to co-expression, a complementary approach to assessing co-  
146 functionality, using the COXPRESdb database (Okamura et al., 2015). We observed that co-  
147 essentiality substantially outperformed co-expression in recall of protein complexes and physical  
148 interactions recorded in the CORUM and hu.MAP databases, but performance was more  
149 equivocal for STRING (**Figure 2A**), with co-essentiality outperforming co-expression only for top-  
150 ranked partner genes. Of note, STRING integrates seven sources of evidence (experimental

151 evidence, other pathway/complex databases, co-expression, literature text-mining, genomic co-  
152 localization across species, co-occurrence across species, and existence of a gene-gene fusion  
153 in any species); to reduce the potential for circularity, we restricted to gene pairs supported by  
154 experimental evidence. Collectively, these results suggest that co-essentiality and co-expression  
155 may have complementary roles in biological pathway mapping, with co-essentiality being better-  
156 suited for detecting protein complexes and direct physical interactions and co-expression being  
157 better-suited for detecting more indirect functional relationships such as regulatory relationships.

158  
159 Co-essentiality was particularly effective in detecting interactions for a number of key cancer  
160 drivers. For example, 8 of *TP53*'s 10 significant co-essential partners are known interactors  
161 (*USP28*, *CDKN1A*, *TP53BP1*, *MDM2*, *CHEK2*, *ATM*, *PPM1D*, *UBE2K*) compared with only 3 of  
162 the top 10 co-expressed partners in COXPRESdb (**Table S2**). For *KRAS*, 3 of 5 significant co-  
163 essential partners are known interactors compared to none of the top 5 co-expressed partners;  
164 and for *BRCA1*, 3 of 6 co-essential partners are known interactors compared to 1 of 6 for co-  
165 expression.

166

### 167 **Co-essential modules recapitulate known pathways and nominate novel members**

168 To group genes into modules based on their co-essentiality profiles from GLS, we used  
169 ClusterONE (Nepusz et al., 2012), a commonly-used algorithm originally developed for the *de*  
170 *novo* discovery of protein complexes from protein-protein interaction data (see Methods).  
171 Crucially, the modules generated by ClusterONE are allowed to be overlapping, enabling  
172 pleiotropic genes to be constituents of multiple modules. One major parameter that affects the  
173 quality of ClusterONE module detection is the module density  $d$ , which determines (on a 0-to-1  
174 scale) how strong the internal connections within a cluster must be relative to the connections on  
175 the edge of the cluster between members and non-members. It has previously been observed  
176 that inferring networks at multiple scales helps provide the most complete picture of biological

177 systems (Dutkowski et al., 2013; Kramer et al., 2014); accordingly, we found that lower values of  
178  $d$  (e.g.  $d = 0.2$ ) led to larger modules and better performance on STRING, while larger values  
179 (e.g.  $d = 0.9$ ) led to smaller modules and better performance at recapitulating complexes and  
180 physical interactions from CORUM and hu.MAP, with intermediate values (e.g.  $d = 0.5$ ) striking a  
181 balance between the two (**Figure S3**). Because modules generated with different values of  $d$   
182 capture different types of biological pathways, we generated a combined list of modules using  $d$   
183 = 0.2 (N = 168),  $d = 0.5$  (N = 1892) and  $d = 0.9$  (N = 3169) (**Table S3**).

184  
185 The 5,218 co-essential modules in this almanac, containing between 4 and 741 genes,  
186 correspond to a wide range of biological pathways (**Table S3**). To estimate the fraction of the  
187 genome our modules assign a putative function, we counted the number of genes included in a  
188 module that is highly (at least 100-fold) enriched for some GO term. By this metric, our set of co-  
189 essential modules assign putative functions to 14,383 genes, a much larger fraction of the  
190 genome compared to previous approaches used to cluster genes based on co-essentiality profiles  
191 (**Figure 2B**).

192  
193 Among the 1,311 modules with greater than 100-fold enrichments are modules highly enriched  
194 for genes involved in growth regulation (**Figures 3A, B**), autophagy (**Figure 3C**), cell-cell signaling  
195 (**Figure 3D**), the DNA damage response (**Figure 3E**), innate immunity (**Figure 3F**), glycolysis  
196 (**Figure 3G**), transcriptional regulation (**Figures 3H, I**), the cell cycle (**Figure 3J**), and  
197 mitochondrial respiration (**Figure 3K**), among many others (**Table S3**).

198  
199 Several important features of the co-essential modules are highlighted by the examples shown in  
200 Figure 3. First, the ability of ClusterONE to include genes in multiple modules enabled  
201 identification of pleiotropic gene functions, as illustrated by the identification of two modules  
202 containing *MTOR* that closely correspond to the two mTOR-containing complexes, mTORC1

203 **(Figure 3A)** and mTORC2 **(Figure 3B)** (Saxton and Sabatini, 2017). Second, co-essential  
204 modules are not limited to physical complexes, as illustrated by the near-complete identification  
205 of the glycolysis pathway **(Figure 3G)**, or even to cell-autonomous pathways, as illustrated by the  
206 identification of the Jagged-Notch intercellular signaling pathway **(Figure 3D)**. Third, by examining  
207 modules identified at different values of  $d$ , we were able to detect multiple scales of biological  
208 organization, as illustrated by the set of modules we identified that correspond to mitochondrial  
209 respiration **(Figure 3Ki-v)**. Module #256, a 163-member module identified at  $d = 0.2$ , includes  
210 most nuclear-encoded subunits of the four respiratory chain complexes required for mitochondrial  
211 ATP synthesis, as well as numerous mitochondrial tRNA synthetases, elongation factors, and  
212 components of the mitoribosome required for synthesis of the mitochondrial subunits of the  
213 mitochondrial respiratory complexes **(Figure 3K)**. Several modules identified with  $d$  set to 0.9, by  
214 contrast, correspond to smaller units of functional organization, such as module #4250, a 13-  
215 member module that contains 12 subunits of the ATP synthase complex **(Figure 3Kiv, Table S3)**,  
216 and module #2072, a 99-member module comprising 61 subunits of the mitochondrial ribosome  
217 and many of its associated factors **(Figure 3Kv, Table S3)**. Fourth, we noted that whereas several  
218 modules are nearly “complete” representations of a biological pathway, such as module #520,  
219 which comprises most of the genes identified in recent targeted screens for autophagy regulators  
220 **(Figure 3C, cf. Shoemaker et al., 2019)**, and no genes not previously implicated in autophagy,  
221 many modules highly enriched for a particular pathway also contain one or more uncharacterized  
222 genes (red boxes, **Figure 3E, F, I, H, J, K**).

223

## 224 **Using co-essential modules to systematically predict the functions of uncharacterized** 225 **genes**

226 Hundreds of human genes have not been assigned any molecular function. Co-essentiality  
227 profiling has recently been used to assign uncharacterized genes to pathways, with predictions  
228 based on the functions of the genes that have the largest Pearson correlations with the

229 uncharacterized gene (Pan et al., 2018; Wang et al., 2017). However, it has remained unclear  
230 how broadly useful co-essentiality information is in predicting the functions of the hundreds of  
231 genes that remain uncharacterized, which likely span diverse biological processes.

232  
233 Co-essential modules are in many cases highly enriched for functionally related genes, and thus  
234 enable unbiased, genome-wide prediction of uncharacterized gene function. To generate a list of  
235 functional predictions for uncharacterized genes, we first mined the UniProt database to assemble  
236 a list of uncharacterized genes, which we defined as those genes with UniProt annotation score  
237 (a heuristic measure of protein annotation content) of 2 or lower. We then enumerated all the  
238 uncharacterized genes present in modules at least 100-fold enriched for one or more GO terms,  
239 excluding GO terms with < 5 genes.

240  
241 The 102 uncharacterized genes assigned putative functions by this method are included, on  
242 average, in ~2 co-essential modules, yielding a list of 220 functional predictions (**Table S4**). We  
243 excluded uncharacterized genes in syntenic modules (i.e. modules comprising genes all located  
244 on the same chromosome) from this count, since while many syntenic modules likely represent  
245 *bona fide* co-functional gene sets, others may be confounded by residual copy number artifacts  
246 or other factors (**Methods**). Notably, several of these predictions are consistent with recent  
247 experimental information that has not yet been incorporated into the Uniprot database, including  
248 *C19orf52* in mitochondrial import (Kang et al., 2016), *C16orf59* in centriole function (Breslow et  
249 al., 2018), *TMEM261* in mitochondrial respiratory complex I (Stroud et al., 2016), and *PTAR1* in  
250 Golgi function (Blomen et al., 2015), showcasing the power of this method in assigning gene  
251 functions. To prioritize a list of functional predictions for experimental validation, we ranked  
252 modules by their maximal enrichment for a given GO term, because these predictions yield the  
253 most readily testable predictions. The top uncharacterized gene predictions (ranked by GO term



254 enrichment) span a wide range of biological processes, including mitochondrial respiration,  
255 transcription, DNA repair, Golgi function, lipid synthesis, and endocytosis (**Table S4**).

256

257 ***TMEM189* encodes the orphan enzyme plasmalogen ethanolamine desaturase required for**  
258 **plasmalogen synthesis**

259 We selected two genes, *TMEM189* (ranked #1) and *C15orf57* (ranked #18), for experimental  
260 validation. *TMEM189*, also known as *KUA*, encodes a 270 amino acid transmembrane protein  
261 whose function was largely unexplored prior to our work, with previous studies focused on the  
262 observation that it can be transcribed as both an independent ORF and as a fusion with the  
263 neighboring *UBE2V1* gene. Both *TMEM189* and *TMEM189-UBE2V1* have been observed to  
264 localize to the endoplasmic reticulum (Thomson et al., 2000).

265

266 The top-ranked co-essential module containing *TMEM189*, module 2213, is highly enriched for  
267 genes required for synthesis of ether lipids (**Figure 4A**), which comprise a broad class of structural  
268 and signaling lipids involved in regulation of membrane fluidity and sensitivity to oxidative stress,  
269 and which account for approximately 20% of the phospholipids in human cells (Nagan and Zoeller,  
270 2001). We noted that genes in this module appeared to be particularly essential in cell lines  
271 derived from haematological cancers (**Figure 4B**). Whereas several genes in this module,  
272 including *AGPS*, *FAR1*, and *GNPAT*, are specifically involved in ether lipid synthesis, some genes  
273 contained in this module, including *PCYT2* and *EPT1*, are required for both ether lipid synthesis  
274 and the synthesis of other ethanolamine-containing phospholipids. Based on this prediction, we  
275 hypothesized that *TMEM189* could play a role in lipid biosynthesis and have a specialized role in  
276 the synthesis of ether lipids.

277

278 To interrogate the functional role of *TMEM189* in lipid biosynthesis in an unbiased manner, we  
279 extended a targeted lipidomics method (Contrepois et al., 2018; Schüssler-Fiorenza Rose et al.,

280 2019) to measure the absolute concentrations of several hundred lipid species in cell extracts.  
281 We compared concentrations of these lipids in cell extracts derived from HeLa-Cas9 cells that  
282 stably expressed single guide RNAs (sgRNAs) targeting either *TMEM189* or a control genomic  
283 locus. Strikingly, though the vast majority of quantified lipid species were present in similar  
284 concentrations in both types of cell extracts, cell extracts expressing *TMEM189*-targeting sgRNAs  
285 contained dramatically lower concentrations of 37 lipid species belonging to the ether lipid  
286 subclass plasmenylethanolamines (**Figure 4C, 4D, Table S5**), also known as ethanolamine  
287 plasmalogens, and higher concentrations of 30 lipid species belonging to ether lipid subclass  
288 plasmanylethanolamines (**Figure 4C, 4E**). Plasmanylethanolamines differ from  
289 plasmenylethanolamines in the presence of a single double bond in the sn-1 acyl chain, which  
290 forms part of the plasmalogen-defining vinyl ether bond. Plasmanylethanolamines and  
291 plasmenylethanolamines form a known precursor-product relationship, with  
292 plasmanylethanolamines rapidly converted into plasmenylethanolamines in the endoplasmic  
293 reticulum by the orphan enzyme plasmanylethanolamine desaturase (PEDS), which was first  
294 reported in mammalian cell extracts over forty years ago (reviewed in (Snyder et al., 1985)).  
295  
296 The accumulation of the precursors, and loss of the product, of the reaction catalyzed by PEDS  
297 in cells expressing *TMEM189*-targeting sgRNAs strongly implicates *TMEM189* as the gene  
298 responsible for orphan PEDS activity. Two orthogonal lines of evidence strongly support this  
299 conclusion. First, we examined a cell line, RAW.12, that was evolved to lack plasmalogens and  
300 shown to exhibit a specific defect in PEDS activity (Zoeller et al., 1992), and determined whether  
301 this cell line exhibits deficient expression of *TMEM189*. By immunoblotting for *TMEM189* in cell  
302 extracts prepared from RAW.12 cells or its parent, unmutated cell line, RAW264.7, we confirmed  
303 that *TMEM189* levels were decreased in PEDS-deficient RAW.12 cell extracts (**Figure 4F**).  
304 Second, *TMEM189* bears sequence features consistent with a function in lipid desaturation.  
305 *TMEM189* contains a histidine-rich domain conserved in most lipid desaturase enzymes, and is

306 distantly related to the fatty acid desaturase *FAD4* in Arabidopsis (Gao et al., 2009), which  
307 introduces an unusual double bond in the sn-2 fatty acid (Gao et al., 2009).

308

309 We noted that *TMEM189* is also present in a co-essential module, module #808, which is highly  
310 enriched for genes involved in the biosynthesis of sphingolipids, a distinct class of lipids that  
311 predominantly localizes to the plasma membrane and, similarly to ether lipids, contributes to both  
312 signaling and membrane structure and fluidity. In lipidomic analyses, cell extracts derived from  
313 cells expressing sgRNAs targeting *SPTLC2*, a subunit of serine palmitoyltransferase, the rate  
314 limiting enzyme in sphingolipid biosynthesis, were highly depleted of several sphingolipid species,  
315 whereas abundances of most sphingolipid species were largely unaltered in cell extracts from  
316 HeLa cells expressing *TMEM189*-targeting sgRNAs, ruling out a central role for *TMEM189* in  
317 sphingolipid biosynthesis (**Table S5**). However, we observed that the relative abundances of  
318 several very long chain sphingomyelin species were altered in cells lacking *TMEM189*, with  
319 sphingomyelins with C26 fatty-acids decreased in abundance and C22 and C24 sphingomyelins  
320 increased in abundance (**Figure S4A, Table S5**). We additionally found that affinity-purified  
321 *TMEM189*-GFP complexes, isolated from HeLa cells, were highly enriched for *SPTLC2* (**Figure**  
322 **S4B, Table S6**). Further work is required to determine whether this pair of observations – that  
323 *TMEM189* and *SPTLC2* appear to physically interact, and that the abundances of very long chain  
324 sphingomyelin species are subtly altered in *TMEM189*-knockout cells – reflects a direct role for  
325 *TMEM189* in the regulation of fatty acid incorporation into ceramides. Alternatively, because  
326 sphingolipid composition is tightly regulated to maintain membrane fluidity (Breslow and  
327 Weissman, 2010), the altered sphingolipid profile observed in *TMEM189*-knockout cells may  
328 reflect a compensatory response to loss of plasmalogens and resulting disrupted membrane  
329 composition in *TMEM189*-knockout cells. Regardless of these possibilities, our results provide  
330 conclusive evidence for a primary role for *TMEM189* as the orphan desaturase required for the

331 final step of plasmalogen biosynthesis and provide a striking example of the power of co-essential  
332 modules to predict gene function.

333

### 334 ***C15orf57* is a novel regulator of clathrin-mediated endocytosis**

335 *C15orf57* (also known as coiled-coil domain containing 32 (*CCDC32*) encodes a 185-residue  
336 protein with no annotated function. Recent reports described the existence of a chimeric transcript  
337 of unknown significance that contains *C15orf57* and the gene *CBX3* in certain tumor samples (Xu  
338 et al., 2014). *C15orf57* is present in several overlapping co-essential modules (**Table S3**),  
339 including a module (#2067) that is highly enriched for genes required for clathrin-mediated  
340 endocytosis, in particular subunits of the adaptor protein 2 (AP2) complex (**Figure 5A, B**). One of  
341 the best-described functions of the AP2 complex is to mediate endocytosis of transferrin bound  
342 to the transferrin receptor (Motley et al., 2003), so we hypothesized that *C15orf57* might be  
343 required for cellular uptake of transferrin. To test this, we monitored uptake of transferrin, labeled  
344 with a pH-sensitive fluorescent dye, pHrodo, by HeLa-Cas9 cells expressing sgRNAs targeting  
345 either *C15orf57*, the transferrin receptor (*TFRC*), or a control locus. Cells expressing sgRNAs  
346 targeting either *C15orf57* or *TRFC* exhibited reduced uptake of transferrin compared to cells  
347 expressing control sgRNAs, consistent with a role for *C15orf57* in transferrin uptake (**Figure 5C**).

348

349 To gain further insight into the mechanism by which *C15orf57* functions in clathrin-mediated  
350 endocytosis, we immunoprecipitated *C15orf57*-GFP complexes and analyzed them by mass  
351 spectrometry. *C15orf57*-GFP immunoprecipitates were strongly enriched for all five members of  
352 the AP2 clathrin adaptor complex: AP2S1, AP2A1, AP2A2, AP2M1, and AP2B1 (**Figure 5D**,  
353 **Table S6**). In reciprocal co-immunoprecipitation experiments, we confirmed that *C15orf57*-GFP  
354 physically interacts with AP2S1-mCherry (**Figure 5E**). We additionally confirmed through confocal  
355 microscopy that *C15orf57*-GFP colocalizes with AP2S1-mCherry in small puncta at the cell  
356 surface that likely correspond to clathrin-coated pits, the sites of clathrin-mediated endocytosis

357 **(Figure 5F)**. The identification of the members of the AP2 complex as physical interactors of  
358 C15orf57, and their colocalization in cells, suggests that C15orf57 may regulate clathrin-mediated  
359 endocytosis of transferrin (and possibly other cargoes) by directly modulating AP2 function.

360

### 361 **Identification of cancer type-specific pathway dependencies**

362 A major motivation for high-throughput cancer cell line screening efforts, such as the Achilles  
363 project underlying this work, is the possibility of identifying cancer type-specific vulnerabilities that  
364 could be exploited as therapeutic targets (Tsherniak et al., 2017; Wang et al., 2017). These efforts  
365 have shown promise in identifying individual genes that are selectively essential in specific cancer  
366 types (Chan et al., 2019; Wang et al., 2017). Some cancers have also been observed to harbor  
367 selective dependencies on entire gene pathways (Hart et al., 2015, Campbell et al., 2016). We  
368 asked whether our list of co-essential modules, many of which are highly enriched for genes that  
369 function in the same pathway, could be used to identify cancer-type specific pathway  
370 dependencies.

371

372 To systematically identify differentially-essential modules across tissue types, we obtained cancer  
373 type-specific pathway dependency  $p$ -values for each module-cancer type pair by first calculating  
374  $p$ -values for each gene and then aggregating  $p$ -values across genes in each module. To obtain  
375 uninflated  $p$ -values, we again applied GLS (see Methods). Using this conservative approach, we  
376 identified 444 modules that are differentially essential in cancers derived from 16 distinct tissue  
377 types (**Figure 6A, Table S7**).

378

379 Several of the modules that are most differentially essential in specific tissue types correspond to  
380 canonical tissue-specific cancer drivers, demonstrating the power of this approach to uncover  
381 *bona fide* selective pathway dependencies. As one example, the most significantly breast cancer-  
382 specific module dependency contains *ESR1*, the estrogen receptor (ER), which is overexpressed

383 in over 70% of breast cancers and enables hormone-dependent growth (Ariazi et al., 2006). This  
384 module (as well as the neighborhood that corresponds most closely to this module in the two-  
385 dimensional representation of the network, **Figure 6B**) also contains several genes that  
386 functionally interact with *ESR1*, including *SPDEF*, *FOXA1*, and *GATA3*, three master regulators  
387 of estrogen-receptor-dependent gene expression in breast cancer (Fletcher et al., 2013); retinoic  
388 acid receptor alpha (*RARA*), a target of *ESR1*-dependent transcriptional activity (Roman et al.,  
389 1993); and *TOB1*, a gene required for estrogen-independent growth of ER-positive breast cancers  
390 (Zhang et al., 2016).

391  
392 As a second example, the most significantly differentially-essential module in skin cancer (and its  
393 corresponding neighborhood) (**Figure 6C**) includes several components of the *BRAF-MAPK*  
394 pathway, which is consistent with the fact that *BRAF* is mutated in ~50% of melanomas (Ascierto  
395 et al., 2012), as well as *MITF*, a melanoma-specific oncogene (Garraway et al., 2005) activated  
396 downstream of *BRAF*. Additional module members, including *NFATC2*, *SOX9*, and *SOX10*, have  
397 well-established roles in melanoma (Harris et al., 2010; Perotti et al., 2016). In both of these  
398 examples, the co-essential modules we identified as selectively required in certain cancer types  
399 contain sets of lineage-specific cancer drivers that are known to functionally interact, illustrating  
400 the power of our approach in identifying cancer pathway dependencies. The additional 442  
401 modules that we identify as selectively essential in 16 cancer types (**Table S7**) represent a  
402 resource for identifying novel pathway targets in specific cancer types.

403  
404 **An interactive resource for biological discovery**  
405 We created a web tool ([coessentiality.net](http://coessentiality.net)) (**Figure S5; Video S1**) to enable dynamic visualization  
406 and exploration of the genome-wide co-essentiality map shown in Figure 1C, for which we  
407 anticipate several distinct uses. First, this tool can be used as a starting point for gaining insight  
408 into the function of any gene: users can search for a gene of interest, for example, *KRAS* (**Figure**

409 **S5, Video S1**), which is then highlighted on the interactive 2D layout in the context of its  
410 neighborhood. To understand relationships between sets of genes in a given neighborhood, users  
411 can then directly select gene neighborhoods with the cursor (**Video S1**). Once a gene set is  
412 selected, two data panels are generated: a biclustered heatmap of the genes' essentiality profiles  
413 across the 485 cell lines and a plot of the gene set's enrichment for annotated pathways,  
414 complexes and gene ontology terms (Ashburner et al., 2000; The Gene Ontology Consortium,  
415 2017) (**Figure S5, Video S1**). Users can compare the essentiality profile of the selected gene set  
416 with the mutational status and expression level of other selected genes. For example, with the  
417 *KRAS*-containing neighborhood selected, users can plot the lines in which *KRAS* is mutated,  
418 which reveals that *KRAS* and several genes in its neighborhood are selectively essential in *KRAS*-  
419 mutated lines (**Figure S5, Video S1**). Users can also gain insight into pathways that are  
420 particularly required for the growth of individual cancer lines or for cancers derived from a certain  
421 tissue by selecting cell lines (for example, U937 cells, **Video S1**) or tissue types (for example,  
422 kidney cancers, **Figure S5, Video S1**) from drop-down menus, causing the two-dimensional  
423 network to be colored according to each gene's essentiality in the selected cell line or tissue.  
424 Finally, users can upload a specified set of genes – for example, the members of the endocytosis  
425 module containing *C15orf57* (**Figure 5A, Video S1**) – to understand relationships between  
426 multiple genes of interest. We anticipate this tool will be a broadly useful starting point for the  
427 functional characterization of genes and gene sets as well as a powerful hypothesis-generating  
428 platform for users interested in identifying cancer-type specific pathway dependencies.

## 429 DISCUSSION

430 Building a global map of biological pathways in human cells and assigning function to the  
431 thousands of poorly characterized genes remain key challenges in cell biology. In this work, we  
432 demonstrate that mapping co-essentiality across a diverse spectrum of cancer cell lines enables  
433 significant progress toward both objectives.

434  
435 The co-essential network developed here represents, to our knowledge, the most comprehensive  
436 and statistically robust genome-wide perturbational pathway map of human cells to date. Unlike  
437 double-perturbation approaches, our approach is scalable to all pairs of genes in the genome;  
438 and unlike prior approaches to co-essentiality mapping, it is statistically well-calibrated despite  
439 the lack of independence among the screens it was derived from. A recent comparison of modules  
440 derived from different biological networks suggested that modules created based on co-  
441 expression data are better able to recall gene relationships than co-essentiality data, in a GWAS-  
442 based benchmarking approach (Choobdar et al., 2019). By contrast, we find that co-essentiality-  
443 derived networks outperform co-expression-derived networks in their ability to recall protein  
444 complexes. The gene-gene relationships evidenced by these different datasets may be  
445 complementary, with co-essentiality especially well-powered to detect protein complexes and co-  
446 expression better able to detect certain indirect pathway relationships (**Figure 2A**). Our global  
447 interaction map and associated web tool showcase the high resolution and versatility of co-  
448 essentiality as a method for *de novo* pathway mapping.

449  
450 Our validations of the role of *TMEM189* in plasmalogen biosynthesis and *C15orf57* in clathrin-  
451 mediated endocytosis highlight the utility of biological hypothesis generation from co-essential  
452 modules. Of note, during the preparation of this manuscript, an entirely orthogonal approach  
453 based on the study of the bacterial protein CarF, a homolog of *TMEM189*, revealed that this  
454 enzyme is responsible for PEDS activity in bacterial cells, and this activity was shown to be



455 conserved in human cells (Gallego-García et al., 2019). The complementary approaches and  
456 orthogonal validations of *TMEM189* as the key enzyme for plasmalogen synthesis will potentiate  
457 dissection of the functions of this largely understudied class of lipids. The specific function of the  
458 plasmalogen-defining vinyl ether bond, which has been proposed to be critical for antioxidant and  
459 oxygen-sensing functions of plasmalogens, has remained difficult to assess experimentally. With  
460 the identity of plasmalogen desaturase now in hand, these and other basic questions  
461 about plasmalogen function can be addressed. Plasmalogens have been noted to be highly  
462 upregulated in a variety of malignancies, and inhibitors of this pathway have recently been  
463 explored as anti-cancer agents (Piano et al., 2015). With the discovery of *TMEM189* as a novel  
464 enzyme required for plasmalogen synthesis, we uncover an additional therapeutically targetable  
465 node in this pathway.

466

467 Our identification of *C15orf57* as a regulator of clathrin-mediated endocytosis adds another key  
468 player to this pathway; further work is required to uncover its precise mechanistic function.  
469 Nonetheless, the role of *C15orf57* in binding the AP2 complex and regulating endocytosis that we  
470 describe here may advance understanding of the significance of recurrent *C15orf57-CBX3* gene  
471 fusions that have been proposed to contribute to hepatocellular carcinoma (Zhu et al., 2019). In  
472 addition to the two uncharacterized genes for which we experimentally validated their predicted  
473 functions, we note that several additional functional predictions generated by our method are  
474 supported by evidence from other unbiased, high-throughput approaches. For example, *C7orf26*,  
475 which we predict is involved in the function of the integrator complex that is required for  
476 transcription of small non-coding RNAs (Chen and Wagner, 2010) was observed to interact with  
477 several subunits of the integrator complex in high-throughput IP-MS experiments; its expression  
478 is also highly correlated with several integrator subunits (Okamura et al., 2015; Szklarczyk et al.,  
479 2017). As a second example, the functionally uncharacterized gene *TMEM242*, for which we  
480 predict a function in mitochondrial respiration, was reported to interact with the gene product of

481 *NDUFA3*, a subunit of mitochondrial complex I, in a high-throughput study (Szklarczyk et al.,  
482 2017). Overall, our experimental validation of two uncharacterized gene predictions, paired with  
483 our list of 100 additional uncharacterized genes for which we predict a function, provides an  
484 immediately useful resource for the broader cell biology community.

485  
486 Beyond nominating functions for entirely uncharacterized genes, the modules identified in this  
487 study have the potential to suggest novel roles for genes with existing functional annotations.  
488 Within the modules that were the focus of experimental validations in this study, we note that  
489 *SEC14L1*, previously characterized for its role in inhibiting the anti-viral RIG-1 pathway (Li et al.,  
490 2013), is now the only gene in 8-gene module #2213 that has not been shown to be required for  
491 ether lipid synthesis. Notably, *SEC14L1* contains a conserved lipid-binding domain, and is related  
492 to a yeast gene, *SEC14*, involved in non-vesicular lipid transport (Saito et al., 2007).  
493 Plasmalogens are known to traffic to the cell surface after being synthesized in the endoplasmic  
494 reticulum, but the factors that regulate plasmalogen trafficking, and the route plasmalogens take  
495 to the plasma membrane, remain undefined; the possibility that *SEC14L1* regulates either  
496 plasmalogen synthesis or transport is thus a prime example of an experimentally testable  
497 hypothesis motivated by our findings. Indeed, preliminary support for this hypothesis is provided  
498 by *in vitro* studies of yeast Sec14, which revealed that purified Sec14 is sufficient to catalyze ether  
499 lipid transport between lipid membranes (Szolderits et al., 1991). Further study is required to  
500 confirm that human *SEC14L1* can similarly drive ether lipid transport between membranes and to  
501 discern whether non-vesicular lipid transport by *SEC14L1* could mediate ether lipid trafficking to  
502 the cell surface in living cells.

503  
504 An additional key feature of the co-essential modules we identify, by virtue of their overlapping  
505 nature, is their ability to recapitulate multiple levels of biological organization as well as  
506 relationships between distinct pathways and complexes, as exemplified by the set of modules

507 corresponding to distinct complexes of the mitochondrial respiratory chain (**Figure 3K**). The set  
508 of modules enriched for the 10-subunit endoplasmic reticulum (ER) membrane complex (EMC)  
509 provides an additional striking example. The EMC complex was recently shown to function as a  
510 transmembrane insertase required for the biogenesis of a subset of transmembrane proteins,  
511 particularly tail-anchored and polytopic proteins (Guna et al., 2018, Shurtleff et al., 2018) and is  
512 additionally noted for its role in cholesterol homeostasis (Volkmar et al., 2019). We identify several  
513 modules enriched for EMC subunits, including a 7-gene module (#5037) containing 6 EMC  
514 subunits and *TMEM147*, a gene recently shown to cooperate with EMC in transmembrane protein  
515 biogenesis (Talbot et al., 2019), and a 16-gene module (#2450) containing 8 EMC subunits and  
516 2 genes (*MBTPS1* and *SCAP*) required for cholesterol homeostasis. In addition, we identify a 23-  
517 gene module (#534) that contains 5 EMC subunits and 12 subunits of the lysosomal V-ATPase  
518 complex (8 of which are separately contained in 9-gene module 2450). Several of these V-  
519 ATPase subunits were recently identified in an unbiased proteomic study as among the proteins  
520 most dependent on EMC function for their stability (Tian et al., 2019). Thus, the set of modules  
521 we identify that are enriched for EMC subunits correspond to known inter-pathway interactions,  
522 and demonstrate the power of co-essential modules to not only identify individual pathways but  
523 to point to possible inter-pathway relationships.

524  
525 Numerous additional modules (**Figure 3B, D, E, F, J, K, Table S3**) that are highly enriched for  
526 one GO term contain components of additional pathways not previously linked to the most-  
527 enriched pathway. As one example, two essential components of the mitotic spindle checkpoint,  
528 *BUB1B* and *MAD2L1*, are present not only in a module (#1360) highly enriched for genes involved  
529 in kinetochore/spindle checkpoint function but also, unexpectedly, in a module (#739) highly  
530 enriched for interferon (IFN) response genes (**Figure 3F**). *BUB1B* and *MAD2L1* have well-defined  
531 roles in the prevention of chromosome instability (CIN) (Ricke et al., 2008) but have not previously  
532 been linked to interferon gene function. One possible connection is suggested by the recent

533 observation that tumor cells with high levels of CIN generate cytosolic DNA that activates an IFN  
534 response and drives cancer progression (Bakhoun et al., 2018). *BUB1B* and *MAD2L1* prevent a  
535 particular form of CIN - aneuploidy resulting from premature sister chromatid separation – but the  
536 relevance of this type of CIN in the pathogenic process described in that study was not addressed  
537 and may warrant further investigation.

538

539 A key future direction in expanding the ability of this resource to detect functional genetic  
540 relationships is to measure additional phenotypes beyond cancer cell line growth under standard  
541 conditions. The 485 cell lines screened thus far are derived from a wide range of tissue types and  
542 exhibit a highly diverse set of mutational backgrounds, and the Achilles project plans to extend  
543 this screening to several thousand cell lines. Nonetheless, our approach has the potential to  
544 benefit greatly from screens performed in primary tissues; across individuals; under non-ambient  
545 conditions, such as in the presence of a drug or cellular stress; or with readouts other than cellular  
546 fitness, such as changes to cell morphology, gene expression, or cellular activity. Such screens  
547 offer the potential to uncover an even broader spectrum of functional interactions, and could  
548 enable a dynamic map of pathway rewiring across conditions. Overall, our genome-wide mapping  
549 of the human co-essential network comprises a powerful resource for biological hypothesis  
550 generation and discovery.

551 **ACKNOWLEDGMENTS**

552 We thank Raphael Zoeller for providing RAW.12 cells and the parent cell line. We gratefully  
553 acknowledge Evan Boyle, Justin Donnelly, Mackenzie Pearson, Grace Anderson, Scott Simpkins,  
554 Trey Ideker, and members of the Bassik and Kundaje labs for helpful discussions. This work was  
555 supported by an NIH Director's New Innovator award (1DP2HD084069-01) to M.C.B., a grant  
556 from NIH/ENCODE (5UM1HG009436-02) to A.K. and M.C.B., a Stanford Bio-X Bowes Fellowship  
557 to M.W., a Stanford School of Medicine Dean's Postdoctoral Fellowship to R.A.K., and a Jane  
558 Coffin Childs Postdoctoral Fellowship to R.A.K..

**Figure 1**

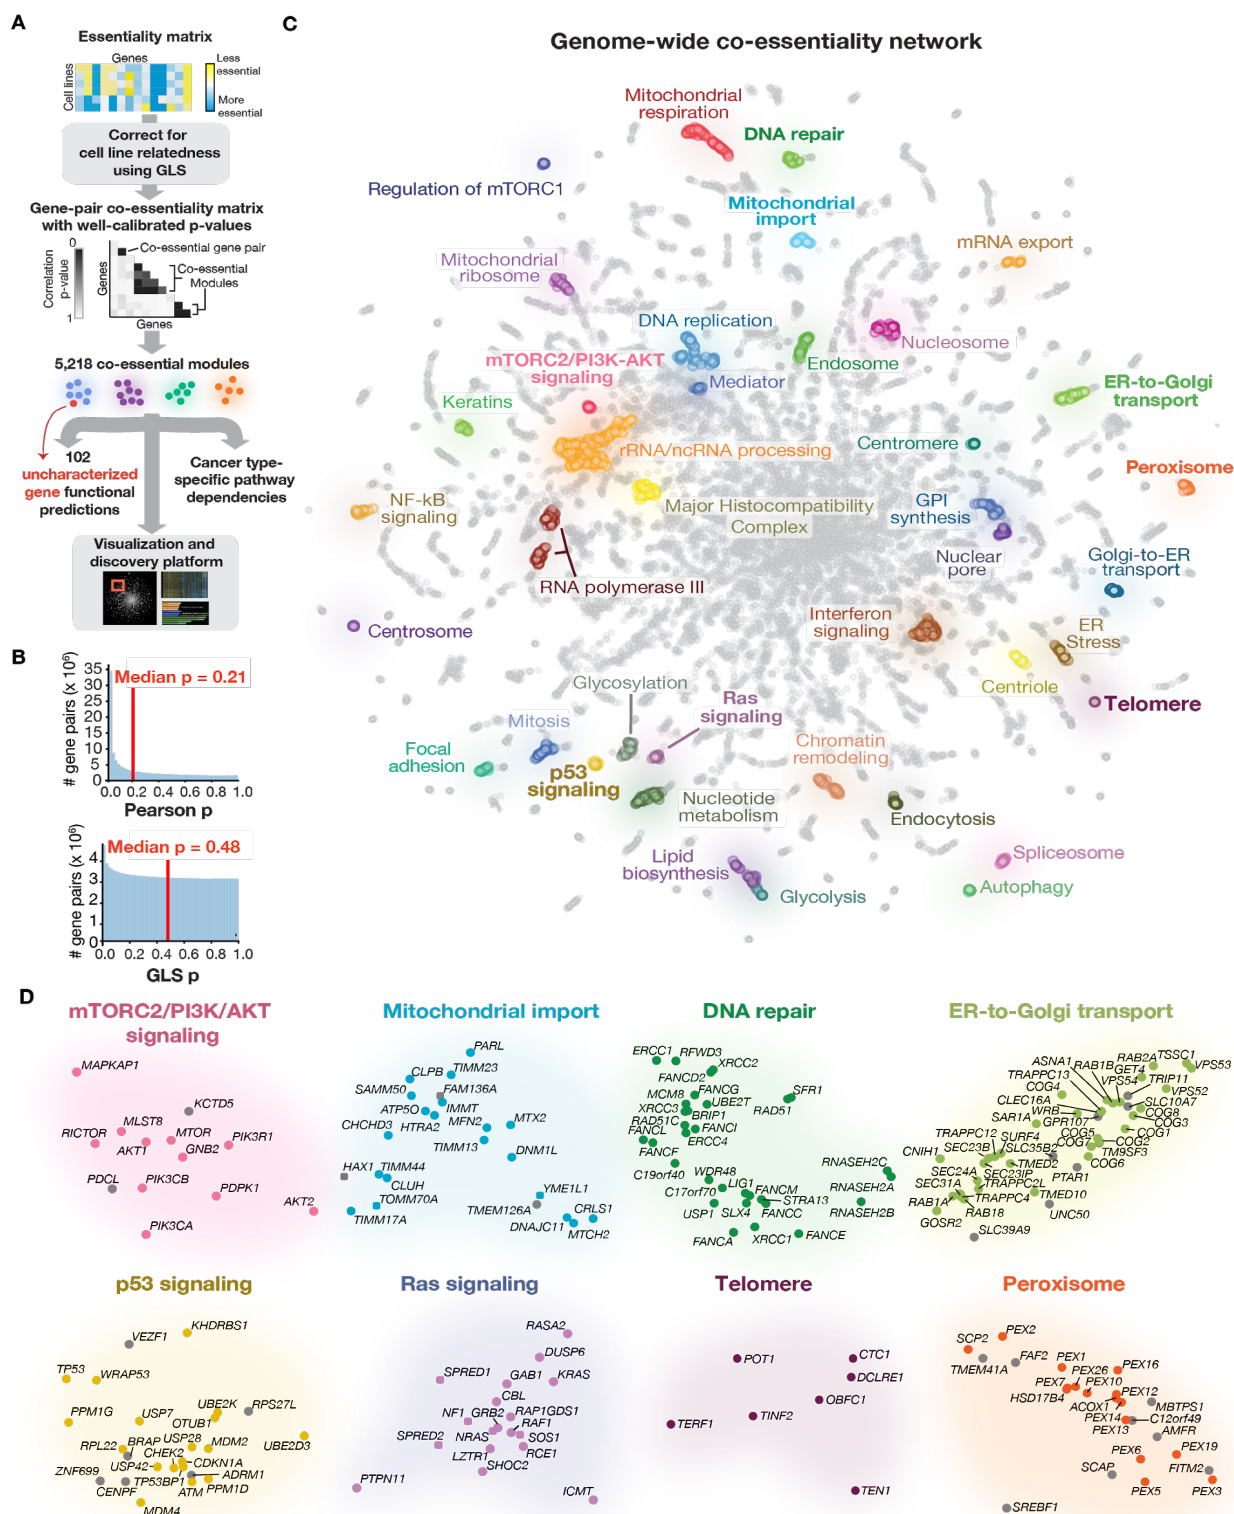

559 **Figure 1: Construction of a genome-wide co-essentiality network.**

560 (A) Overview of our approach.

561 (B) Histograms of GLS and Pearson correlations across all pairs of genes.

562 (C) Global structure of the co-essentiality network, with manually annotated 'neighborhoods'  
563 highly enriched for particular pathways and complexes. Bolded neighborhood labels are  
564 highlighted in (D).

565 (D) Selected neighborhoods, with manually-defined known pathway members indicated in color  
566 and other genes in gray.

567 See also Figure S1.

**Figure 2**

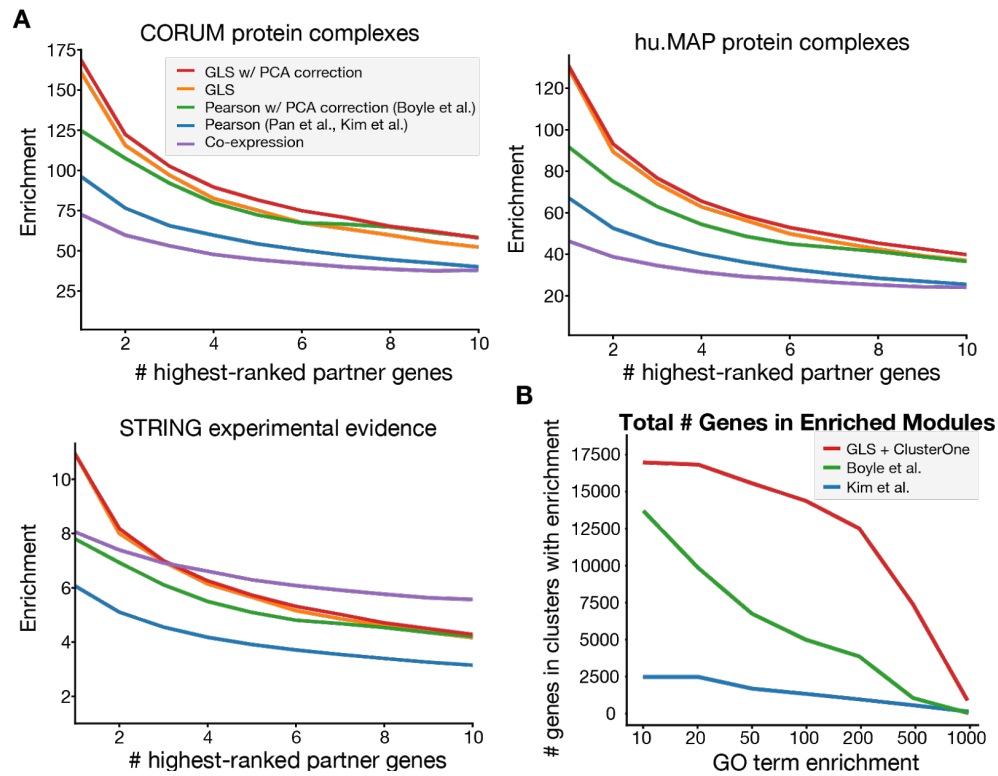



568 **Figure 2: GLS improves recall of known functional interactions in co-essential gene pairs**  
569 **and modules.**

570 **(A)** Enrichment of interactions from GLS- and Pearson-based co-essentiality (with/without PCA-  
571 based bias correction) using the DepMap dataset, as well as co-expression using the  
572 COXPRESdb dataset, in CORUM, hu.MAP and STRING, considering the top 1-10 partners per  
573 gene.

574 **(B)** Number of genes in clusters/modules at least N-fold enriched for some GO term, excluding  
575 the gene itself from the enrichment calculation, for various N from 10 to 1000.

576 See also Figures S2, S3, S6 and S7

577

## Figure 3

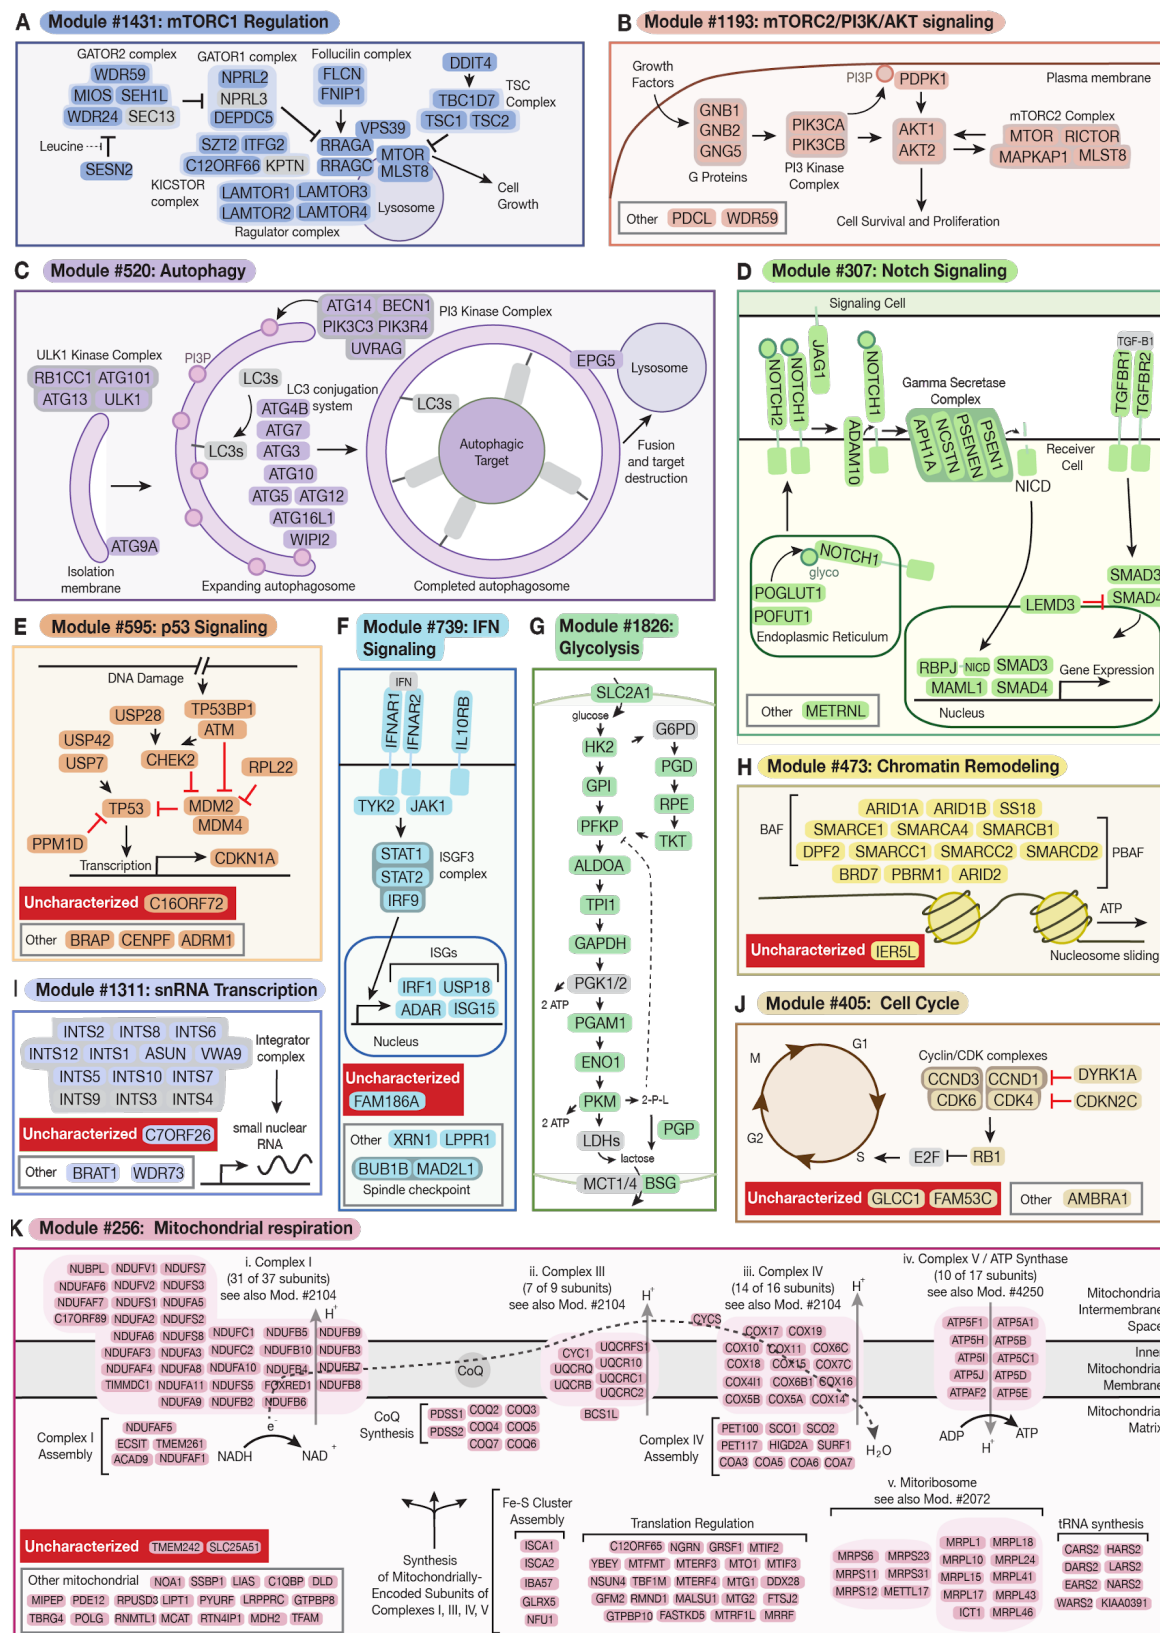

578 **Figure 3: Co-essential modules recapitulate known pathways and nominate novel pathway**  
579 **members.**

580 **(A-K)** 10 examples of co-essential modules; all genes in each module are shown. Genes without  
581 previous evidence of pathway involvement are indicated as either “uncharacterized” (Uniprot  
582 annotation score <3) or “other”. Red inhibitory arrows between gene pairs indicate both negative  
583 regulation and negatively correlated essentiality profiles. In (A), (C), (G), (I), and (J), core pathway  
584 members not included in the module are shown in gray. In (K), subunit counts for mitochondrial  
585 respiration complexes were based on HGNC gene sets as of Oct 2019 (Povey et al., 2001).  
586 Abbreviations: (B, C) PI3P, phosphatide-inositol-3-phosphate; (C) LC3s, Microtubule-associated  
587 1A/1B-light chain (LC3) family members; (D) NICD, Notch intracellular domain; glyco, fucose and  
588 glucose modifications transferred to NOTCH1 by POFUT1 and POGLUT1; TGF-B1, transforming  
589 growth factor beta 1; (F) IFN, interferon; ISGs, interferon-stimulated genes; (G) 2-P-L, 2-phospho-  
590 lactate (toxic byproduct of PKM) (Collard et al., 2016); (H) BAF, BRG- or HBRM-associated factors  
591 complex; PBAF, polybromo BAF complex; (K) Mod., module; CoQ, coenzyme Q.

## Figure 4

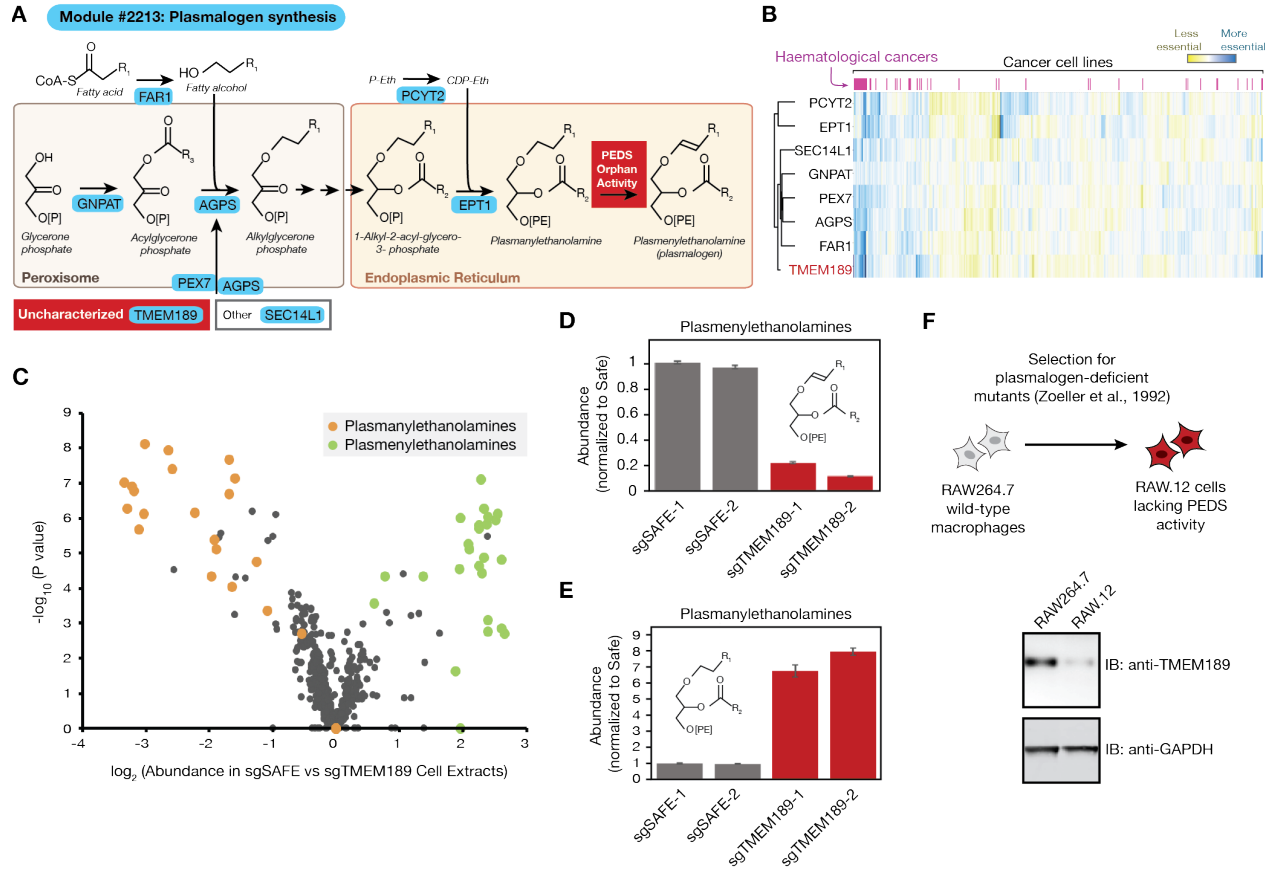

592 **Figure 4: *TMEM189* encodes the orphan enzyme plasmanylethanolamine desaturase**  
593 **required for synthesis of plasmalogen lipids.**

594 (A) Schematic of module #2213 with manual annotations of gene function. Uncharacterized gene  
595 selected for validation shown in red box. PEX7 is shown importing cytosolic AGPS across the  
596 peroxisomal membrane into the peroxisome matrix (Braverman et al., 1997).  
597 Plasmanylethanolamine desaturase (PEDS) orphan enzyme activity indicated in orange. P-eth,  
598 phosphoethanolamine; CDP-Eth, cytidine diphosphate ethanolamine.

599 (B) Heatmap of bias-corrected essentiality scores of genes in module 2213 in 485 cancer cell  
600 lines.

601 (C) Volcano plot of all lipid species detected in lipidomic experiment, with ratio of lipid abundance  
602 in extracts derived from sgSAFE-1-expressing cells relative to sgTMEM189-1-expressing cells  
603 plotted on x-axis.

604 (D) Total abundance (relative to Safe-targeting sgRNA control #1) of 37 unambiguously identified  
605 plasmenylethanolamine species in cell extracts prepared from HeLa cells transduced with  
606 indicated sgRNAs. Error bars represent standard deviation (n = 4 technical replicates).

607 (E) Total abundance (relative to Safe-targeting sgRNA control #1) of 30 unambiguously identified  
608 plasmanylethanolamine species in cell extracts prepared from HeLa cells transduced with  
609 indicated sgRNAs. Error bars represent standard deviation (n = 4 technical replicates).

610 (F) Top, schematic of generation of RAW.12 derivative of RAW264.7 macrophage-like line with  
611 confirmed deficiency in plasmanylethanolamine desaturase (PEDS) activity, as reported in Zoeller  
612 et al., 1992. Bottom, immunoblotting (IB) with anti-TMEM189 antibodies in RAW264.7 parental  
613 line and RAW.12 PEDS-deficient line.

614 See also Figure S4.

## Figure 5

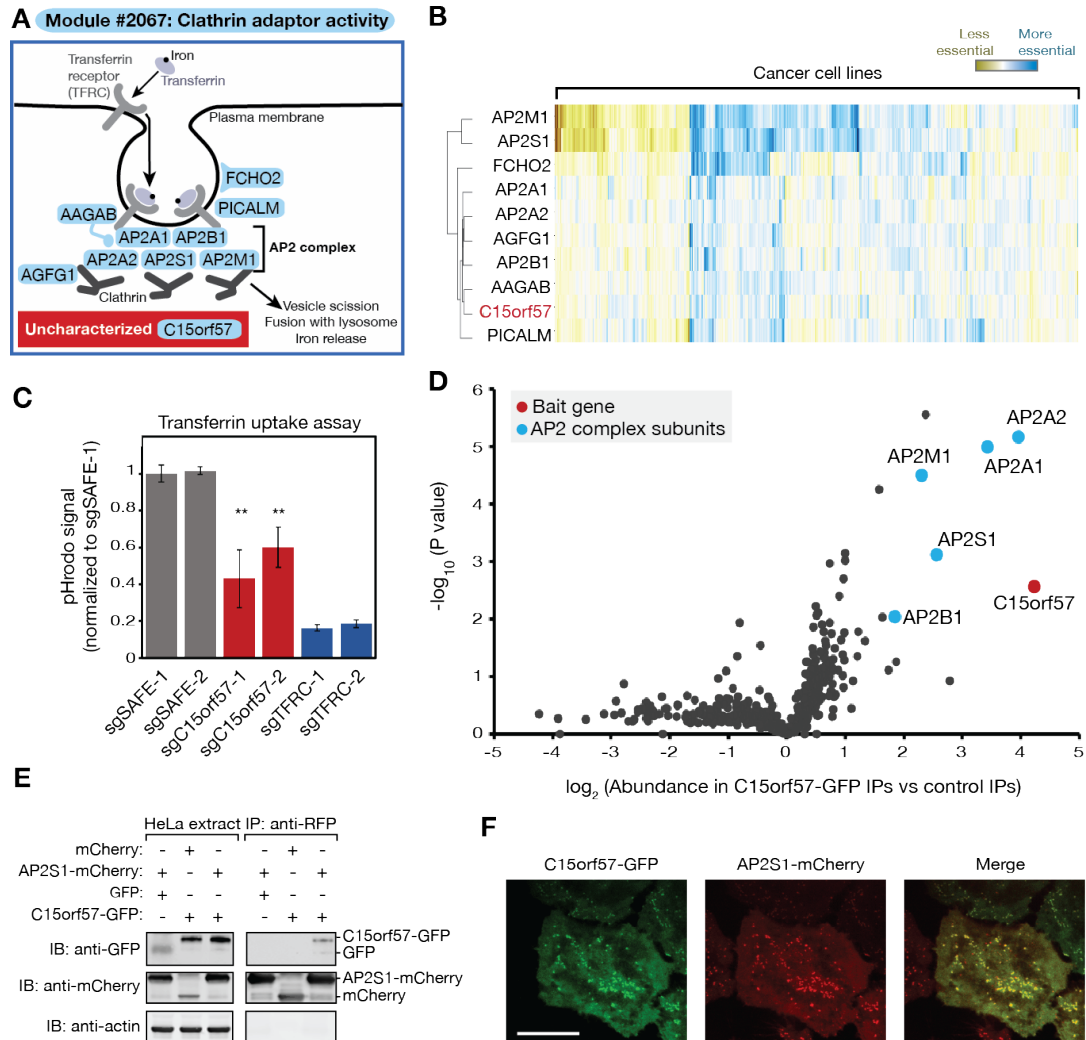

615 **Figure 5: C15orf57 is required for efficient clathrin-mediated endocytosis of transferrin.**

616 (A) Schematic of module #2067. Uncharacterized gene selected for validation shown in red. AP2,  
617 adaptor protein 2.

618 (B) Heatmap of bias-corrected essentiality scores of genes in module #2067 in 485 cancer cell  
619 lines.

620 (C) Transferrin-pHrodo uptake assay for clathrin-mediated endocytosis (24h timepoint). Error bars  
621 represent standard deviation (n = 3 technical replicates, two-tailed Student's t-test, \*\*p<.01). Data  
622 shown are representative of three independent experiments.

623 (D) Volcano plot of mass spectrometric (TMT) analysis of C15orf57-GFP immunoprecipitates  
624 (IPs).

625 (E) Extracts prepared from indicated HeLa cell extracts were subjected to immunoprecipitation  
626 with anti-RFP magnetic resin. Extracts and IP samples were resolved by SDS-PAGE and followed  
627 by immunoblotting with indicated antibodies.

628 (F) Microscopy of HeLa cells transduced with C15orf57-GFP and AP2S1-mCherry constructs.  
629 Scale bar, 20µm.

**Figure 6**

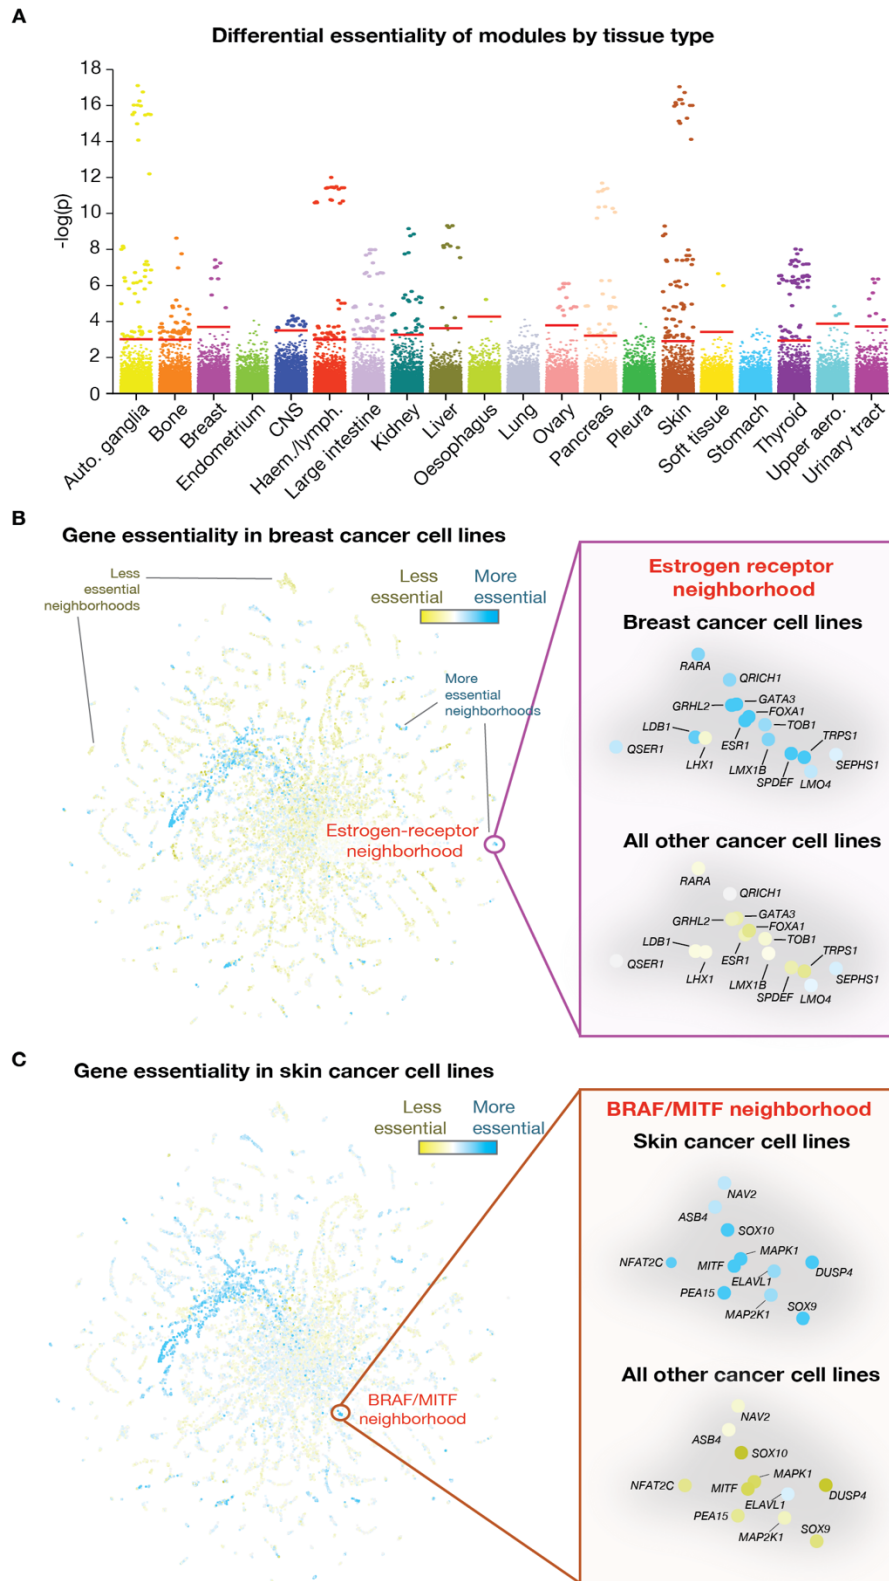



630 **Figure 6: Identification of cancer type-specific module dependencies.**

631 **(A)** Differential essentiality of co-essential modules in cell lines derived from 20 tissue types. -  
632  $\log_{10}(\rho\text{-values})$  for each module are plotted for each tissue (see Methods). Red bars indicate FDR  
633 thresholds for each tissue type. Auto., autonomic; CNS, central nervous system; Haem.,  
634 haematological; lymph., lymphoma; aero., aerodigestive.

635 **(B)** Average bias-corrected gene essentiality in breast cancer cell lines plotted on two-  
636 dimensional co-essentiality network, with gene neighborhood containing *ESR1* highlighted on the  
637 right.

638 **(C)** Average bias-corrected gene essentiality in skin cancer cell lines plotted on two-dimensional  
639 co-essentiality network, with gene neighborhood containing *BRAF* and *MITF* highlighted on the  
640 right.

641 See also Figure S5, Video S1.

642 **SUPPLEMENTAL LEGENDS**

643

644 **Figure S1: Co-essentiality profiling and the limitations of Pearson correlation**

645 **(A)** The concept of co-essentiality: (left) a pair of functionally related genes are both essential in  
646 some cell lines and both non-essential in other lines. Essentiality can be quantified from CRISPR  
647 screens as the logarithm of the growth effect of the gene's knockout (intuitively, the number of  
648 times fewer cells with the knockout doubled during the screen, compared to control cells). (Right)  
649 a pair of unrelated genes have uncorrelated essentiality across cell lines.

650 **(B)** Simulation of how biological relatedness between cell lines inflates Pearson correlation  $p$ -  
651 values. Duplicating each point 10 times with slight noise (analogous to duplicating each screen in  
652 10 related lines) makes the previously non-significant ( $p = 0.6$ ) blue correlation highly significant  
653 ( $p = 0.007$ ) and the significant red correlation ( $p = 7 \times 10^{-5}$ ) substantially more so ( $p = 2 \times 10^{-103}$ ),  
654 despite similar correlation magnitudes.

655

656 **Figure S2: Number of co-essential partners per gene by average gene essentiality**

657 Number of co-essential partners at 1% and 10% FDR as a function of a gene's average  
658 essentiality (pre-bias-correction CERES score) across lines.

659

660 **Figure S3: Benchmarking of cluster density  $d$**

661 F1 score (harmonic mean of precision and recall) for various values of the module density  
662 parameter  $d$  on CORUM, hu.MAP and STRING. F1 scores represent the performance of a binary  
663 network based on the modules (i.e. "are genes A and B in the same module?") at predicting a  
664 binary network based on the benchmark dataset (i.e. "are genes A and B partners in the  
665 benchmark dataset?").

666

667 **Figure S4: Additional functional characterization of *TMEM189* suggests a secondary role**  
668 **in sphingolipid biosynthesis**

669 (A) Abundances (relative to Safe-targeting sgRNA control #1) of very long chain sphingomyelin  
670 species (with acyl chain length indicated on x-axis) in cell extracts prepared from HeLa cells  
671 transduced with indicated sgRNAs. sgSafe data and sgTMEM189 data are from same data set  
672 represented in Figure 4C.

673 (B) Volcano plot of mass spectrometric (TMT) analysis of TMEM189-GFP immunoprecipitates.  
674 Data are from same mass spectrometry analysis as data shown in Figure 4D.

675

676 **Figure S5: A web tool for interactive exploration of the co-essential network**

677 Example use case for the interactive web tool (coessentiality.net). A gene, *KRAS*, was selected  
678 using the dropdown menu at top left and is marked with a red arrow in the scatterplot below.  
679 Genes selected for analysis – *KRAS* and its gene neighborhood – are designated with red points  
680 in the main panel (left). The heatmap panel (top right) shows that *KRAS*-mutant lines (selected  
681 for display using the search bar above the heat map and indicated as black marks in the “Mutation”  
682 bar above the heatmap) are enriched in a cluster (far right) that is marked by increased essentiality  
683 of *KRAS*. The pathway enrichment panel (bottom right) shows strong enrichments for Ras  
684 signaling and related pathways. The points in the main panel have also been selected in the tissue  
685 search bar (top middle) to be colored according to the average essentialities of each gene in  
686 kidney-derived cell lines. Gene sets can also be either saved or uploaded as csv files using the  
687 respective buttons in the top center (under “Gene set download/upload”). Some web colors and  
688 font sizes were optimized for display in this figure.

689

690

691

692

693 **Figure S6: Benchmarking of syntenic versus non-syntenic modules**

694 Enrichment of syntenic (both genes on same chromosome) and non-syntenic co-essential pairs  
695 for annotated interactions CORUM, hu.MAP and STRING databases, using the same  
696 benchmarking strategy as in Figure 2.

697

698 **Figure S7: Number of genes assigned putative functions by various co-essentiality module  
699 detection methods, after excluding syntenic modules.**

700 Number of genes in non-syntenic clusters/modules at least N-fold enriched for some GO term,  
701 excluding the gene itself from the enrichment calculation, for various N from 10 to 1000.

702

703 **Table S1: Spreadsheet of significant co-essential interactions at 10% per-gene FDR.**

704 List of all co-essential gene pairs identified in this study, with the number of Pubmed citations (as  
705 of Oct 2019) and chromosome location for each gene, and the direction of the gene correlation  
706 (positive (+) or negative (-)).

707

708 **Table S2: Co-essential and co-expressed partners of *TP53*, *KRAS* and *BRCA1*.**

709 Significant GLS co-essential versus top co-expressed partners of *TP53*, *KRAS* and *BRCA1*.  
710 Genes in bold have strong evidence of being part of the same pathway.

711

712 **Table S3: Spreadsheet of co-essential modules.**

713 List of all 5,228 co-essential modules and their constituent genes, with top 3 most-enriched gene  
714 ontology terms and their associated enrichments and *p*-values, the value of *d* used to define the  
715 module, and a link to the heatmap of batch-corrected essentiality data across 485 cell lines.

716

717

718

719 **Table S4: Uncharacterized gene functional predictions.**

720 List of uncharacterized genes that are present in co-essential modules >100-fold enriched for a  
721 gene ontology term, the Uniprot annotation score and number of Pubmed citations for each gene  
722 (as of Oct 2019), and the set of genes in each cluster that is and is not annotated with the most-  
723 enriched gene ontology term.

724

725 **Table S5: Lipidomics data.**

726 Lipid species concentrations for indicated lipids measured using Lipidzyzer platform in indicated  
727 cell lines. QC1, QC2, and QC3 indicate quality controls (see Methods).

728

729 **Table S6: Mass spectrometry data for proteomic analysis of C15orf57 and TMEM189**  
730 **interactomes.**

731 Proteomic data, including complete list of proteins and enrichment  $p$ -values, for C15orf57 and  
732 TMEM189 interactome analyses in Figures 4 and 5.

733

734 **Table S7: Cancer type-specific module dependencies.**

735 List of 444 differentially essential modules across 16 tissue types, ranked by  $p$ -value.

736

737 **Video S1: Example use cases of co-essential browser.**

738 Guide to use of co-essential browser showing how to navigate web tool in the context of multiple  
739 use cases, including gene lookup, gene set selection, and gene list upload.

## 740 **METHODS**

### 741 **Code availability**

742 Code to generate co-essential gene pairs, co-essential modules, modules with cancer type-  
743 specific dependencies, and the two-dimensional layout will be made available at  
744 <https://github.com/kundajelab/coessentiality>.

745

### 746 **Dataset**

747 The dataset used to determine co-essential interactions consists of the 485 genome-wide  
748 CRISPR screens from the Achilles project 18Q3 release (Tsherniak et al., 2017). Specifically,  
749 17,634 genes were screened in 485 cell lines from 27 distinct lineages using the Avana CRISPR  
750 library (Doench et al., 2016), and gene-level effects were quantified using the CERES algorithm  
751 to account for variability in guide effectiveness and copy number across lines (Meyers et al.,  
752 2017), resulting in a 17,634 x 485 matrix of normalized gene-level effects. Intuitively, gene-level  
753 effects represent the number of times fewer cells with the knockout doubled during the screen,  
754 compared to control cells. This dataset is publicly available at  
755 <https://ndownloader.figshare.com/files/12704099>, or at <https://depmap.org/portal/download/all/>  
756 under release “DepMap Public 18Q3” and file “gene\_effect.csv”.

757

### 758 **Bias correction**

759 Bias correction was applied as described in Boyle et al., 2018. Specifically, the first 4 principal  
760 components of the gene-by-cell-line essentiality matrix across all olfactory receptor genes,  
761 defined here as those with the “olfactory receptor activity” gene ontology (GO) term (Ashburner  
762 et al., 2000; The Gene Ontology Consortium, 2017), were subtracted from the original CERES  
763 score matrix, resulting in a new bias-corrected matrix. To avoid multicollinearity and allow  
764 inversion of the covariance matrix for generalized least squares (see below), subtraction of the

765 first 4 principal components was followed by removal of 4 cell lines (arbitrarily chosen to be the  
766 last 4), resulting in a 17,634-by-481 matrix of bias-corrected CERES scores.

767

### 768 **Quantifying co-essential gene pairs**

769 The co-essentiality between each pair of genes was quantified using generalized least squares  
770 (Aitkin, 1935). In a departure from previous approaches to co-essentiality profiling, GLS  
771 automatically and flexibly accounts for the non-independence of cell lines by incorporating  
772 information about the covariation between every pair of screens. When all screens are  
773 independent and have the same variance in effect sizes across genes, the GLS effect size  
774 becomes exactly equivalent to the Pearson correlation coefficient. GLS is closely related to the  
775 linear mixed models (LMMs) used for population structure correction in genome-wide association  
776 studies (Yu et al., 2006), an analogous problem to ours.

777

778 Specifically, GLS estimates the vector of parameters  $\beta$  of the linear regression model  $Y = X\beta + \epsilon$ ,  
779 where  $Y$  is a vector of observations,  $X$  is a matrix of features corresponding to those observations,  
780 and  $\epsilon$  are the errors or residuals, under the assumption that the mean of the errors is 0 and their  
781 variance is  $\Sigma$ , where  $\Sigma$  is a covariance matrix specified by the practitioner. The only difference from  
782 ordinary least squares (OLS) is the value of  $\Sigma$ ; OLS assumes that it is the identity matrix, while  
783 GLS allows it to be any user-specified value. Here, we set  $\Sigma$  to be the covariance matrix of the  
784 data itself, i.e.  $V_{ij}$  is the covariance of cell lines  $i$  and  $j$  across all genes in the CRISPR screen.

785

786 In practice, GLS is solved by a) inverting  $\Sigma$ , in our implementation  
787 (`statsmodels.regression.linear_model.GLS` from the *statsmodels* Python package) by using the  
788 Moore-Penrose pseudoinverse instead of the true inverse as a computational optimization, b)  
789 taking the Cholesky decomposition of this inverse covariance matrix  $\text{chol}(\Sigma^{-1})$ , c) transforming both

790  $\mathbf{Y}$  and  $\mathbf{X}$  by  $\text{chol}(\Sigma^{-1})$  to obtain the transformed observations  $\mathbf{Y}' = \text{chol}(\Sigma^{-1}) \mathbf{Y}$  and transformed features  
791  $\mathbf{X}' = \text{chol}(\Sigma^{-1}) \mathbf{X}$ , and d) running OLS on  $\mathbf{Y}'$  and  $\mathbf{X}'$ . (When  $\Sigma$  is the identity matrix,  $\text{chol}(\Sigma^{-1})$  is as well,  
792 so  $\mathbf{Y}' = \mathbf{Y}$  and  $\mathbf{X}' = \mathbf{X}$  and GLS reduces to OLS.)

793  
794 GLS was run separately on each gene pair, resulting in a 17,634-by-17,634 matrix of GLS  $p$ -  
795 values. Specifically, the *endog* argument of `statsmodels.regression.linear_model.GLS` (the  
796 output) was set to the length-481 vector of bias-corrected CERES scores for one of the two genes,  
797 the *exog* argument (input) set to a 481-by-2 matrix where the first column is the other gene's bias-  
798 corrected CERES scores and the second column is a constant vector of all ones (i.e. the  
799 intercept), and the *sigma* argument set to the 481-by-481 covariance matrix of the bias-corrected  
800 CERES scores. Given these three pieces of data, the GLS outputs a  $p$ -value indicating the  
801 statistical significance of the degree of co-essentiality between the pair of genes. Note that while  
802 the GLS  $p$ -value is consistent regardless of which of the two genes is chosen as *endog* and which  
803 as *exog*, the GLS effect size is not consistent with respect to this choice, and as a result is not  
804 reported. For benchmarking, GLS was also run on the non-bias-corrected data using the exact  
805 same procedure, but using the full 485 cell lines.

806  
807 As a computational optimization, the rate-limiting step of the GLS calculation (inverting the  
808 covariance matrix and then taking the Cholesky decomposition) was cached and reused for each  
809 pair of genes, since all gene pairs use the same covariance matrix. With this optimization, the  
810 amortized time complexity of GLS is equivalent to Pearson correlation. The same GLS  
811 implementation was used to calculate the Pearson correlation (with and without bias correction)  
812 between each pair of genes, by setting the covariance matrix to the identity matrix.

813

814



## 815 **Pearson correlation simulations**

816 For the simulations in Figures S1A and B, the x coordinates of the 8 red data points were sampled  
817 to be uniformly distributed between -4 and 0. The y coordinates were then sampled from  $0.9x +$   
818  $\text{Normal}(0, (1 - 0.9^2)^{1/2})$  to have a Pearson correlation of approximately 0.9. To be visually pleasing,  
819 points were repeatedly re-simulated until two constraints were satisfied: the most extreme x and  
820 y coordinates had to be between 0.15 and 0.4 from the edge of the interval [-4, 0], and the  
821 minimum x and y differences between each pair of points had to be at least 0.2.

822  
823 A second set of blue points were added alongside the red points. The blue points and red points  
824 share the same x coordinates, but the blue points' y coordinates were sampled to be uniformly  
825 distributed between -1 and 0 to avoid having any significant correlation with the x coordinates. To  
826 enforce this lack of correlation, the y coordinates were repeatedly sampled until both the Pearson  
827 and Spearman correlation  $p$ -values were greater than 0.5.

828  
829 In the right half of Figure S1B, the same red and blue points were plotted, in addition to 20  
830 duplicates of each of these points, shifted by a small amount of noise sampled from  $\text{Normal}(0,$   
831  $0.1)$ .

## 833 **Benchmarking on CORUM, hu.MAP and STRING**

834 For the benchmarking in Figure 3, we compared five methods: co-essentiality with GLS or  
835 Pearson and with or without bias correction, and co-expression with COXPRESdb. We used the  
836 same versions of COXPRESdb benchmarked in Pan et al., downloaded from the supplemental  
837 data to that paper at <https://ndownloader.figshare.com/files/10975364> and remapped from Entrez  
838 IDs to gene names using the mapping at <https://ndownloader.figshare.com/files/9120082>. When  
839 benchmarking, we considered only the  $N = 15,552$  genes present in both the Avana library and  
840 COXPRESdb.

841  
842 For STRING, we used all the gene pairs in version 10.5 restricted to Homo sapiens  
843 ([https://stringdb-](https://stringdb-static.org/download/protein.links.detailed.v10.5/9606.protein.links.detailed.v10.5.txt.gz)  
844 [static.org/download/protein.links.detailed.v10.5/9606.protein.links.detailed.v10.5.txt.gz](https://stringdb-static.org/download/protein.links.detailed.v10.5/9606.protein.links.detailed.v10.5.txt.gz)). To  
845 avoid circularity, we removed gene pairs supported only by co-expression, i.e. for which the only  
846 non-zero score was for co-expression.

847  
848 Following the strategy of Pan et al., we compared methods by considering their rankings on a  
849 per-gene basis. Specifically, we considered only the top N partners for each gene for N from 1 to  
850 10, and looked at how enrichment varied as a function of N. We used the same versions of  
851 CORUM and hu.MAP benchmarked in Pan et al.

852  
853 Enrichments were calculated as the percent of the top N gene pairs in the pathway or complex  
854 database, divided by the percent of gene pairs found in the database. For instance, to calculate  
855 the enrichment of COXPRESdb in CORUM for N = 2, we found the top 2 co-expressed partners  
856 per gene according to COXPRESdb (N = 2 \* 15,552 gene pairs), computed the percent of these  
857 pairs that were part of the same CORUM complex, and divided by the percent of the 15,552 \*  
858 15,552 gene pairs that were part of the same CORUM complex.

859  
860 Note that Boyle et al. perform an additional transformation of *p*-values after PCA correction based  
861 on the empirical null distribution of *p*-values for olfactory genes, but since this transformation is  
862 monotonic it does not affect the rankings of partner genes used in our benchmarking.

863  
864 **Co-essential modules**  
865 Co-essential modules were ascertained with the ClusterONE algorithm (Nepusz et al., 2012).  
866 Briefly, ClusterONE generates modules by greedily adding nodes (genes) starting from a

867 randomly selected seed node, so long as the sum of the edge weights within the module is  
868 sufficiently high relative to the sum of the boundary edge weights between genes in the module  
869 and their neighbors. It then merges sufficiently overlapping modules as a post-processing step,  
870 while allowing genes to be members of multiple modules (protein complexes or pathways).

871  
872 ClusterONE was run on the 17,634-by-17,634 matrix of GLS  $p$ -values after row-wise false  
873 discovery rate correction, with edge weights set to one minus the false discovery rate  $q$ -value  
874 (Storey and Tibshirani, 2003). Default settings were used for ClusterONE, except for changing  
875 the module density parameter  $-d$  (also known as  $--min-density$ ) from its default of 0.3, as  
876 discussed in the main text. For the list of modules in Table S3, all modules generated with values  
877 of  $d$  set to 0.2, 0.5, and 0.9 were merged into a single list. 11 modules that were identical at  
878 different values of  $d$  were retained in this list but were excluded from the reported count of total  
879 modules.

880  
881 We noted that the resulting list of co-essential modules contained many modules that are highly  
882 enriched for genes that localize close to one another in the genome. In several cases, these  
883 modules correspond to clusters of functionally related genes that are known to colocalize in the  
884 genome, such as histone- and protocadherin-encoding genes, though in the majority of cases it  
885 remains unclear whether the presence of colocalized genes in a module reflects their shared  
886 function in a biological pathway or if it relates to vulnerabilities of CRISPR screening to copy-  
887 number artifacts that are difficult to account for perfectly (Meyers et al., 2017). Supporting the idea  
888 that co-essentiality for colocalized genes may represent a mix of true- and false-positive signals,  
889 we find substantial enrichment of syntenic gene pairs (both genes on the same chromosome) in  
890 CORUM, hu.MAP and STRING, but less enrichment than for non-syntenic gene pairs (**Figure**  
891 **S6**). We note that even after excluding syntenic modules (i.e. those that contain genes which are  
892 all located on the same chromosome), our set of co-essential modules still assigns putative

893 functions to approximately 10,000 genes using the metric described earlier in relation to Figure  
894 2B (i.e.the number of genes included in a module that is at least 100-fold enriched for some GO  
895 term), approximately twice as many as the next-best method (**Figure S7**). To enable full utilization  
896 of the dataset as well as easy discernment of syntenic and non-syntenic gene pairs and modules,  
897 we report all co-essential gene pairs and modules in Tables S1 (co-essential pairs), S3 (co-  
898 essential modules) and S4 (uncharacterized gene predictions) and annotate each as syntenic or  
899 non-syntenic.

900

### 901 **Identification of cancer type-specific pathway dependencies**

902 Cancer type-specific pathway dependency  $p$ -values for each module and cancer type (Table S7)  
903 were obtained by 1) computing  $p$ -values for each gene and cancer type, then 2) aggregating  $p$ -  
904 values across genes in each module. In step 1), GLS was run separately for each gene with the  
905 same covariance matrix and output/*endog* argument (bias-corrected essentiality for a particular  
906 gene) as before (see “Quantifying co-essential gene pairs”). However, unlike before, the *exog*  
907 argument (input) was set to a 481-by-21 matrix of binary indicator variables for the 20 cancer  
908 types listed in Figure 6A (1 if a cell line is from that cancer type, 0 otherwise) plus an all-ones  
909 intercept column. The two other cancer types with CRISPR screen data from DepMap, cervical  
910 and biliary, were excluded due to only having a single cell line each. This multiple regression  
911 yielded 20  $p$ -values for the gene, one per cancer type. We note that this approach is equivalent  
912 to an ANOVA, except using GLS instead of OLS.

913

914 In Step 2),  $p$ -value aggregation was performed separately for each module and cancer type using  
915 the Cauchy Combination Test/Aggregated Cauchy Association Test (Liu and Xie, 2019; Liu et al.,  
916 2019) with equal weights on all genes. In Python, this step can be expressed straight-forwardly  
917 as “`module_p = cauchy.sf(np.tan((0.5 - gene_ps) * np.pi).mean())`”, where *gene\_ps* is a (number  
918 of module genes)-length vector of gene  $p$ -values for a particular cancer type, and *module\_p* is

919 the combined  $p$ -value for the module. Crucially, given that our gene-level  $p$ -values are highly  
920 correlated among genes in a module, the test is able to accommodate  $p$ -values from correlated  
921 tests (unlike the more commonly used Fisher's combined  $p$  test, which uses a chi-squared instead  
922 of a Cauchy distribution to perform  $p$ -value aggregation), and we verified that the combined  $p$ -  
923 values were not inflated (median  $p$ -value = 0.56).

924

### 925 **Global structure of the co-essential network**

926 The two-dimensional interaction map visualization was constructed to have two properties: (a)  
927 genes in many of the same ClusterONE modules are close together; (b) gene pairs with high GLS  
928 co-essentiality are close together. This was done by forming a graph  $G_{CO}$  from the ClusterONE  
929 modules (as above) and another  $G_{GLS}$  from the co-essentiality data, mixing the two with proportion  
930  $\alpha$  to form the mixed graph:

931

$$932 \quad G = \alpha G_{CO} + (1-\alpha)G_{GLS}$$

933

934 (We set  $\alpha=0.99$  to rely on the relatively specific and dense ClusterONE modules where possible,  
935 while falling back on pairwise GLS analysis to link genes not in any module to the rest of the  
936 network.)

937

938 The graph  $G_{GLS}$  was constructed by computing, for each pair of genes,  $-\log(p)$  given by GLS  
939 between the two genes. This was denoised and compressed by keeping each gene's edges to its  
940 10 nearest neighbors and zeroing the other edges, resulting in each gene having a minimum of  
941 10 neighbors in the graph. (We found our analyses fairly stable to varying the number of nearest  
942 neighbors between 4 and 100.) The graph  $G_{CO}$  was constructed using the same procedure, but  
943 with each pairwise similarity computed using the Jaccard similarity between the sets of

944 ClusterONE modules the respective genes belonged to (for sets A and B, this is  $J(A,B) =$   
945  $|A \cap B| / |A \cup B|$ ).

946

947 To visualize the network G efficiently on a global scale, we relied on the framework of *diffusion*  
948 *maps* (Coifman and Lafon, 2006), which basically decompose the variation in essentiality profiles  
949 over the network into short- and long-range pathway components, resulting in an embedded  
950 space for genes in the network. The genes' positions here are relatively accurate for genes in  
951 well-separated pathways, and less so for finer distinctions – this embedded space (the “diffusion  
952 map”) is a smoothed version of the network, with each gene being represented in low dimension  
953  $d = 40$ . The embedded space was constructed from G as follows.

954

955 G was first normalized to remove the disproportionate influence of high-degree “hub” genes in the  
956 layout, resulting in a matrix  $G_2$ . With this gene-wise degree expanded as a matrix  $D_G = \text{diag}(\sum_j G_{ij})$ ,  
957 the normalization operation is:

958

$$959 \quad G_2 = D_G^{-1} G D_G^{-1}$$

960

961 This *density normalization* further corrects for biased sampling of the network by the data  
962 (Coifman and Lafon, 2006; Haghverdi et al., 2015), as analyses on  $G_2$  consider the gene network  
963 corrected for the variable density of characterized genes.

964

965 The diffusion map embeds  $G_2$ , and takes the properties of random walks on it to reveal multi-  
966 scale pathway structure. The transition probabilities of such a random walk on  $G_2$  are the row-  
967 sum-normalized  $T = D_2^{-1} G_2$ , where  $D_2 = \text{diag}(\sum_j [G_2]_{ij})$ .

968

969 This transition matrix  $T$  describes the evolution of any random walk, and its right eigenvectors  
970  $e_1, \dots, e_n$  give a diffusion map embedding when appropriately scaled. The embedding requires a  
971 parameter  $t$ , which controls the overall scale of the pathways modeled by the embedding. If the  
972 corresponding eigenvalues are  $\lambda_1 \geq \lambda_2 \geq \dots$ , then for any  $t > 0$ , the embedded coordinates of the  
973 genes  $[\Phi_t]_1, [\Phi_t]_2, \dots, [\Phi_t]_{40}$  are:

974

$$975 \quad [\Phi_t]_i = \lambda_i^t e_i$$

976

977 A crucial choice is that of the scale parameter  $t$ . As the current co-essentiality data are some-  
978 what noisy for inferring fine-grained gene-gene relationships, we found it necessary to smooth  
979 them by increasing the value of  $t$  in constructing the embedding. We increased  $t$  to the minimum  
980 such that  $d = 40$  dimensions captured 90% of the variance in the embedded space  $\Phi_t$ , and  
981 computed the resulting diffusion map  $\Phi$ . This simultaneous optimization of  $t$  and  $\Phi_t$  made the  
982 procedure adapt to and preserve large-scale global structure in a fully data-driven way, without  
983 substantive parameter tuning and using only a few matrix multiplications and one SVD.

984

985 We applied UMAP (McInnes et al., 2018) to this diffusion map embedding as in scanpy for the  
986 final global layout. Our diffusion maps implementation is in Python using the numpy and scipy  
987 packages, and includes other choices of normalization as well. The entire process ran in less than  
988 4 minutes on the GLS- and ClusterONE-derived matrices on an Intel i7 Core CPU.

989

## 990 **Browser heatmap**

991 The 481-cell-line bias-corrected CERES essentiality scores are plotted alongside the global co-  
992 essentiality network in the browser (Figure S5), and update interactively when a subset of genes

993 is selected. The heatmap's rows and columns are ordered by co-clustering them to find latent  
994 components, using the *sklearn.cluster.bicluster.SpectralCoclustering* implementation of the SVD-  
995 based algorithm of (Dhillon, 2001).

996

### 997 **GO enrichment**

998 Below the essentiality score heatmap in the browser is the enrichment analysis panel, which  
999 displays hypergeometric *p*-values for the selected gene set against various database annotation  
1000 terms, as computed by gProfiler (Raudvere et al., 2019).

1001

### 1002 **Module heatmaps**

1003 To create heatmaps for each module (Table S3), the bias-corrected CERES scores for genes in  
1004 the module were hierarchically biclustered with Ward linkage using the  
1005 *scipy.cluster.hierarchy.linkage* function from the *scipy* Python package, with the *method* argument  
1006 set to 'ward' and the *optimal\_ordering* argument set to True. This biclustering was then visualized  
1007 with the *seaborn.clustermap* function from the *seaborn* Python package.

1008

### 1009 **Module GO term enrichments**

1010 In Table S3, GO term enrichment *p*-values were calculated via a hypergeometric test  
1011 implemented using the *scipy.stats.hypergeom.sf* function from the *scipy* Python package. When  
1012 calculating enrichments and *p*-values, genes not found in any module were excluded. GO term  
1013 enrichments and *p*-values were calculated for all GO terms from the GO consortium (Ashburner  
1014 et al., 2000; The Gene Ontology Consortium, 2017), except for GO terms with fewer than 20 total  
1015 genes across all modules and three overly broad GO terms (biological process:biological process,  
1016 cellular component:cellular component and molecular function:molecular function), which were  
1017 excluded. The top 3 most-enriched GO terms for each module were listed with their



1018 hypergeometric  $p$ -values, provided the  $p$ -value was significant at a per-module Bonferroni  
1019 threshold of 0.05, corrected across all GO terms.

1020

### 1021 **Generation of HeLa cell lines expressing individual sgRNAs and tagged genes**

1022 HeLa cells were maintained on tissue culture plastic and cultured in DMEM supplemented with  
1023 100 units/mL penicillin, 100  $\mu$ g/mL streptomycin, and 10% fetal calf serum. Cells were passaged  
1024 by incubation with Accutase, pelleting with centrifugation at 300 g for 5 min at room temperature,  
1025 and replating in fresh growth medium. To transduce cells with individual constructs, HeLa cells  
1026 stably expressing Cas9-BFP were lentivirally infected with constructs expressing either individual  
1027 sgRNAs or GFP- or mCherry-tagged genes and a puromycin resistance (PuroR) or blasticidin  
1028 resistance (BlastR) gene. At 3 d after infection, cells were selected with 2  $\mu$ g/mL puromycin or  
1029 10 $\mu$ g/mL blasticidin for 3d, and cultured for at least 3 d without selection agent before use in  
1030 experiments.

1031

### 1032 **Immunoblotting**

1033 Cleared cell extracts prepared in lysis buffer (50 mM Tris-Hcl pH 7.5, 150 mM NaCl, 1mM EDTA,  
1034 1% Triton X-100, 1 x cComplete protease inhibitor cocktail (Roche) were heated in SDS loading  
1035 buffer and subjected to SDS-PAGE, transferred to nitrocellulose, blotted and imaged using an  
1036 Odyssey CLx (LI-COR Biosciences) or Supersignal West Femto Maximum Sensitivity Substrate  
1037 with a Chemidoc System (Bio-Rad). The following antibodies were used: Rabbit polyclonal anti-  
1038 TMEM189 (HPA059549, Sigma, 1:250), mouse monoclonal anti-GAPDH (AM4300, Fisher),  
1039 rabbit polyclonal anti-mCherry (ab167453, Abcam), mouse monoclonal anti-GFP (A-11120,  
1040 Thermo Fisher) and rabbit polyclonal anti-beta actin (ab8227, Abcam). In Figure 4F, the species  
1041 shown is the predominant species detected using this antibody in RAW264.7 cells and HeLa cells,  
1042 and corresponds to the predicted molecular weight of the *TMEM189-UBE2V1* fusion. Cell extracts  
1043 from HeLa-Cas9 cells expressing sgRNAs targeting either control loci or the *TMEM189* locus

1044 (with >70% knockout efficiency verified using ICE analysis (Synthego)) were used to validate the  
1045 specificity of the anti-TMEM189 antibody (data not shown).

1046

#### 1047 **Time-lapse microscopy for transferrin endocytosis**

1048 HeLa cells that had been transduced with sgRNAs, co-expressed with GFP and PuroR, and  
1049 selected with puromycin as described above were lifted, centrifuged, and re-plated in 24-well  
1050 tissue culture plates in quadruplicate at a density of 50,000 cells per well. After 1 d, cells were  
1051 washed once in dPBS, incubated in dPBS for 30 minutes, and incubated in dPBS containing  
1052 25µg/mL transferrin-pHrodo (Thermo Fisher). Plates were transferred to an incubator and imaged  
1053 every 20 minutes using an Incucyte (Essen). Total red intensity for each well, averaged over 16  
1054 images per well, was calculated after applying a threshold of 1 RCU using top-hat background  
1055 subtraction. Reported values represent the mean total red fluorescence intensity, normalized to  
1056 the total green fluorescence signal to account for small variations in plating density, of triplicate  
1057 wells. Similar results were obtained in three independent experiments using two sets of  
1058 independently-generated cell lines.

1059

#### 1060 **Confocal microscopy**

1061 HeLa cells were transduced with a lentiviral construct coexpressing *C15orf57*-GFP and PuroR,  
1062 and then transduced with a lentiviral construct expressing *AP2S1*-mCherry and BlastR. Cells  
1063 cultured in glass-bottom 24-well plates and imaged in a single plane near the glass surface using  
1064 an inverted Nikon Eclipse Ti-E spinning disk confocal microscope and an Andor Ixon3 EMCCD  
1065 camera using an oil-immersion 100x objective (NA=1.45). Images were assembled and adjusted  
1066 for brightness and contrast in Photoshop (Adobe).

1067

1068

1069

## 1070 **Immunoprecipitation and mass spectrometry**

1071 For immunoprecipitations, HeLa cells that had been transduced with tagged constructs as  
1072 described above were cultured in either T-150 flasks or 15 cm plates and harvested near  
1073 confluency. Cell lysates for each cell line were prepared by detaching cells with trypsin, washing  
1074 in PBS, resuspending in 1 mL IP buffer (50 mM HEPES, pH 6.8, 150 mM NaCl, 2mM EDTA, 1%  
1075 Triton X-100, 1x cOmplete protease inhibitor cocktail (Roche)) and incubating for 30 min on ice.  
1076 Cell lysates were cleared by centrifugation at 5,000 g for 5 min before incubation with 50  $\mu$ l pre-  
1077 washed GFP-TRAP MA beads (Chromotek) for 1 h at 4 degrees Centigrade, with end-over-end  
1078 rotation. Beads were washed 4 times for 5 min with 1mL IP buffer prior to elution with 30  $\mu$ l SDS  
1079 sample buffer at 70 degrees Centigrade. In Figure 5E, a similar procedure was followed, except  
1080 RFP-TRAP MA beads (Chromotek) were used.

1081  
1082 For analysis by mass spectrometry, elutions were loaded on 4-12% Bis-Tris NuPage SDS-PAGE  
1083 gels (Thermo Fisher) and run at 100V for 30 minutes. Gels were stained with SimplyBlue  
1084 SafeStain (Thermo Fisher) and equivalent gel fragments for each lane were extracted, sliced into  
1085 small fragments, and stored in 1% acetic acid. Samples were processed as described previously  
1086 (Haney et al., 2018), with the following modifications. Briefly, gel slices were first resuspended in  
1087 100  $\mu$ L 50 mM ammonium bicarbonate supplemented with 10  $\mu$ l 50 mM dithiothreitol and  
1088 incubated for 30 min at 55°C, and subsequently alkylated with 10  $\mu$ l 100 mM acrylamide for 30  
1089 min at room temperature. Solution phase was discarded, and gel pieces were washed 3 times  
1090 with 100  $\mu$ l 50 mM ammonium bicarbonate/50% acetonitrile for 10 min at room temperature. 100  
1091  $\mu$ L of 50 mM ammonium bicarbonate and 1  $\mu$ g trypsin was added to digest bound proteins during  
1092 an overnight incubation at 37°C. The overnight digests were spun down and the solution was  
1093 collected. Peptides were extracted more two additional times with 50  $\mu$ l of 70% acetonitrile/29%  
1094 water/1% formic acid and incubated for 10 min at 37°C and centrifuged at 10,000 x g for 2 minutes,  
1095 and all three extractions were combined. The combined extracts were dried using a Speedvac

1096 and reconstituted in 100 mM triethylammonium bicarbonate for TMT10plex labelling (Thermo  
1097 Fisher) following the manufacturer's instructions, and samples were mixed to generate the final  
1098 peptide mixture.

1099  
1100 Protein digests were loaded on a Waters Liquid Chromatography column coupled to an Orbitrap  
1101 Fusion mass spectrometer (Thermo Fisher). Peptides were separated using a 25 cm long and  
1102 100 µm inner diameter capillary column packed with Sepax 1.8 µm C18 resin. Peptides were  
1103 eluted off in a 60 min gradient at a flow rate of 600 nl/min from 5% to 35% acetonitrile in 0.1%  
1104 formic acid. Mass spectrometry data was acquired by one full MS scan at 120k resolution followed  
1105 with MS2 using HCD at 30k resolution. The instrument was set to run in top speed mode with 3 s  
1106 cycle.

1107  
1108 Raw data was processed using Thermo Proteome Discoverer software version 2.2. MS data were  
1109 searched against a human proteome database with 1% FDR at peptide level. Protein  
1110 quantification was based on the precursor ion peak intensity using the label free quantitation  
1111 workflow. For Figures 5D and S4B, keratins and proteins identified with only one peptide were  
1112 excluded from analysis. *P*-values were generated from Student's t-tests between duplicate  
1113 samples of indicated tagged genes and all 6 other samples analyzed in the same run (including  
1114 duplicate samples derived from cells expressing GFP-tagged JTB (an unrelated gene), and from  
1115 cells expressing GFP alone).

1116  
1117 **Lipidomics**

1118 HeLa cells expressing sgRNAs targeting either safe loci or the *TMEM189* or *SPTLC2* loci were  
1119 cultured in quadruplicate and harvested by centrifugation after washing with PBS. Lipids were  
1120 extracted from 60 mg cell pellets using a biphasic separation with cold methyl tert-butyl ether  
1121 (MTBE) , methanol and water, as described previously (Schüssler-Fiorenza Rose et al., 2019).

1122 The solvent mixture contained labeled standard lipids stock (SCIEX, cat#: 5040156) to control for  
1123 extraction efficiency and facilitate quantification relative to the known concentrations.

1124

1125 Lipid extracts were analyzed by mass spectrometry using the Lipidyzer platform (Contrepolis et  
1126 al., 2018), comprising a 5500 QTRAP mass spectrometer equipped with a differential mobility  
1127 scan (DMS) interface (SCIEX) and high-flow LC-30AD delivery unit (Shimadzu), as described  
1128 previously (Schüssler-Fiorenza Rose et al., 2019). Briefly, flow injection analysis was performed  
1129 at 8 µl/min in 10mM ammonium acetate in 50:50 dichloromethane:methanol running solution, with  
1130 1-propanol included in curtain gas. DMS parameter settings were set as follows:  
1131 Temperature = Low, Separation Voltage = 3.5 kV and DMS resolution = Low. PC, PE, LPC, LPE  
1132 were quantified with DMS on in negative ionization mode; SM was quantified with DMS on and in  
1133 positive ionization mode; FFA were quantified with DMS off and in negative ionization mode; TAG,  
1134 DAG, CE, and CER were quantified with DMS off and in positive ionization mode. DMS  
1135 compensation voltages were tuned using a set of lipid standards (SCIEX, cat#: 5040141), and a  
1136 quick system suitability test (QSST) (SCIEX, cat#: 50407) was performed to ensure acceptable  
1137 limit of detection for each lipid class. Lipid molecular species were quantified with the Lipidyzer  
1138 Workflow Manager using 54 deuterated IS developed with Avanti Polar Lipids covering 10 lipid  
1139 classes (SCIEX, cat#: 5040156). 17 plasmylethanolamine species with fully saturated, 18-  
1140 carbon acyl chains at the sn-1 position were excluded from analyses, as they cannot be reliably  
1141 differentiated from plasmylethanolamine species with unsaturated 18-carbon acyl chains at the  
1142 sn-1 position (which are scarce in wild-type cells but are expected to accumulate in *TMEM189*-  
1143 knockout cells) with the Lipidyzer platform (M. Pearson, SCIEX, personal communication).

1144

1145

1146

1147 **REFERENCES**

- 1148 Aitkin, A.C. (1935). On least squares and linear combination of observations. Proceedings of the  
1149 Royal Society of Edinburgh 55, 42–48.
- 1150 Alonso, J.M., and Ecker, J.R. (2006). Moving forward in reverse: genetic technologies to enable  
1151 genome-wide phenomic screens in Arabidopsis. Nat. Rev. Genet. 7, 524–536.
- 1152 Ascierto, P.A., Kirkwood, J.M., Grob, J.-J., Simeone, E., Grimaldi, A.M., Maio, M., Palmieri, G.,  
1153 Testori, A., Marincola, F.M., and Mozzillo, N. (2012). The role of BRAF V600 mutation in  
1154 melanoma. J. Transl. Med. 10, 85.
- 1155 Ashburner, M., Ball, C.A., Blake, J.A., Botstein, D., Butler, H., Cherry, J.M., Davis, A.P.,  
1156 Dolinski, K., Dwight, S.S., Eppig, J.T., et al. (2000). Gene ontology: tool for the unification of  
1157 biology. The Gene Ontology Consortium. Nat. Genet. 25, 25–29.
- 1158 Bakhoun, S.F., Ngo, B., Laughney, A.M., Cavallo, J.-A., Murphy, C.J., Ly, P., Shah, P., Sriram,  
1159 R.K., Watkins, T.B.K., Taunk, N.K., et al. (2018). Chromosomal instability drives metastasis  
1160 through a cytosolic DNA response. Nature 553, 467–472.
- 1161 Barabási, A.-L., and Oltvai, Z.N. (2004). Network biology: understanding the cell's functional  
1162 organization. Nat. Rev. Genet. 5, 101–113.
- 1163 Bassik, M.C., Kampmann, M., Lebbink, R.J., Wang, S., Hein, M.Y., Poser, I., Weibezahn, J.,  
1164 Horlbeck, M.A., Chen, S., Mann, M., et al. (2013). A systematic mammalian genetic interaction  
1165 map reveals pathways underlying ricin susceptibility. Cell 152, 909–922.
- 1166 Blomen, V.A., Májek, P., Jae, L.T., Bigenzahn, J.W., Nieuwenhuis, J., Staring, J., Sacco, R.,  
1167 van Diemen, F.R., Oik, N., Stukalov, A., et al. (2015). Gene essentiality and synthetic lethality in  
1168 haploid human cells. Science 350, 1092–1096.

- 1169 Boettcher, M., Tian, R., Blau, J.A., Markegard, E., Wagner, R.T., Wu, D., Mo, X., Biton, A.,  
1170 Zaitlen, N., Fu, H., et al. (2018). Dual gene activation and knockout screen reveals directional  
1171 dependencies in genetic networks. *Nat. Biotechnol.* *36*, 170–178.
- 1172 Boyle, E.A., Pritchard, J.K., and Greenleaf, W.J. (2018). High-resolution mapping of cancer cell  
1173 networks using co-functional interactions. *Mol. Syst. Biol.* *14*, e8594.
- 1174 Braverman, N., Steel, G., Obie, C., Moser, A., Moser, H., Gould, S.J., and Valle, D. (1997).  
1175 Human PEX7 encodes the peroxisomal PTS2 receptor and is responsible for rhizomelic  
1176 chondrodysplasia punctata. *Nat. Genet.* *15*, 369–376.
- 1177 Breslow, D.K., and Weissman, J.S. (2010). Membranes in balance: mechanisms of sphingolipid  
1178 homeostasis. *Mol. Cell* *40*, 267–279.
- 1179 Breslow, D.K., Hoogendoorn, S., Kopp, A.R., Morgens, D.W., Vu, B.K., Kennedy, M.C., Han, K.,  
1180 Li, A., Hess, G.T., Bassik, M.C., et al. (2018). A CRISPR-based screen for Hedgehog signaling  
1181 provides insights into ciliary function and ciliopathies. *Nat. Genet.* *50*, 460–471.
- 1182 Carpenter, A.E., and Sabatini, D.M. (2004). Systematic genome-wide screens of gene function.  
1183 *Nat. Rev. Genet.* *5*, 11–22.
- 1184 Chan, E.M., Shibue, T., McFarland, J.M., Gaeta, B., Ghandi, M., Dumont, N., Gonzalez, A.,  
1185 McPartlan, J.S., Li, T., Zhang, Y., et al. (2019). WRN helicase is a synthetic lethal target in  
1186 microsatellite unstable cancers. *Nature* *568*, 551–556.
- 1187 Chen, J., and Wagner, E.J. (2010). snRNA 3' end formation: the dawn of the Integrator  
1188 complex. *Biochem. Soc. Trans.* *38*, 1082–1087.
- 1189 Choobdar, S., Ahsen, M.E., Crawford, J., Tomasoni, M., Fang, T., Lamparter, D., Lin, J.,  
1190 Hescott, B., Hu, X., Mercer, J., et al. (2019). Assessment of network module identification

- 1191 across complex diseases. *Nat. Methods* 16, 843–852.
- 1192 Chuang, H.-Y., Hofree, M., and Ideker, T. (2010). A Decade of Systems Biology. *Annu. Rev.*  
1193 *Cell Dev. Biol.* 26, 721–744.
- 1194 Coifman, R.R., and Lafon, S. (2006). Diffusion maps. *Applied and Computational Harmonic*  
1195 *Analysis* 21, 5–30.
- 1196 Collard, F., Baldin, F., Gerin, I., Bolsée, J., Noël, G., Graff, J., Veiga-da-Cunha, M., Stroobant,  
1197 V., Vertommen, D., Houddane, A., et al. (2016). A conserved phosphatase destroys toxic  
1198 glycolytic side products in mammals and yeast. *Nat. Chem. Biol.* 12, 601–607.
- 1199 Contrepolis, K., Mahmoudi, S., Ubhi, B.K., Papsdorf, K., Hornburg, D., Brunet, A., and Snyder,  
1200 M. (2018). Cross-Platform Comparison of Untargeted and Targeted Lipidomics Approaches on  
1201 Aging Mouse Plasma. *Sci. Rep.* 8, 17747.
- 1202 Costanzo, M., Baryshnikova, A., Bellay, J., Kim, Y., Spear, E.D., Sevier, C.S., Ding, H., Koh,  
1203 J.L.Y., Toufighi, K., Mostafavi, S., et al. (2010). The genetic landscape of a cell. *Science* 327,  
1204 425–431.
- 1205 Costanzo, M., VanderSluis, B., Koch, E.N., Baryshnikova, A., Pons, C., Tan, G., Wang, W.,  
1206 Usaj, M., Hanchard, J., Lee, S.D., et al. (2016). A global genetic interaction network maps a  
1207 wiring diagram of cellular function. *Science* 353.
- 1208 Dhillon, I.S. (2001). Co-clustering Documents and Words Using Bipartite Spectral Graph  
1209 Partitioning. In *Proceedings of the Seventh ACM SIGKDD International Conference on*  
1210 *Knowledge Discovery and Data Mining*, (New York, NY, USA: ACM), pp. 269–274.
- 1211 Doench, J.G., Fusi, N., Sullender, M., Hegde, M., Vaimberg, E.W., Donovan, K.F., Smith, I.,  
1212 Tothova, Z., Wilen, C., Orchard, R., et al. (2016). Optimized sgRNA design to maximize activity



- 1213 and minimize off-target effects of CRISPR-Cas9. *Nat. Biotechnol.* *34*, 184–191.
- 1214 Drew, K., Lee, C., Huizar, R.L., Tu, F., Borgeson, B., McWhite, C.D., Ma, Y., Wallingford, J.B.,  
1215 and Marcotte, E.M. (2017). Integration of over 9,000 mass spectrometry experiments builds a  
1216 global map of human protein complexes. *Mol. Syst. Biol.* *13*, 932.
- 1217 Du, D., Roguev, A., Gordon, D.E., Chen, M., Chen, S.-H., Shales, M., Shen, J.P., Ideker, T.,  
1218 Mali, P., Qi, L.S., et al. (2017). Genetic interaction mapping in mammalian cells using CRISPR  
1219 interference. *Nat. Methods* *14*, 577–580.
- 1220 Dutkowski, J., Kramer, M., Surma, M.A., Balakrishnan, R., Cherry, J.M., Krogan, N.J., and  
1221 Ideker, T. (2013). A gene ontology inferred from molecular networks. *Nat. Biotechnol.* *31*, 38–  
1222 45.
- 1223 Fletcher, M.N.C., Castro, M.A.A., Wang, X., de Santiago, I., O'Reilly, M., Chin, S.-F., Rueda,  
1224 O.M., Caldas, C., Ponder, B.A.J., Markowitz, F., et al. (2013). Master regulators of FGFR2  
1225 signalling and breast cancer risk. *Nat. Commun.* *4*, 2464.
- 1226 Furukawa, T., Tanji, E., Xu, S., and Horii, A. (2008). Feedback regulation of DUSP6  
1227 transcription responding to MAPK1 via ETS2 in human cells. *Biochem. Biophys. Res. Commun.*  
1228 *377*, 317–320.
- 1229 Gallego-García, A., Monera-Girona, A.J., Pajares-Martínez, E., Bastida-Martínez, E., Pérez-  
1230 Castaño, R., Iniesta, A.A., Fontes, M., Padmanabhan, S., and Elías-Amanz, M. (2019). A  
1231 bacterial light response reveals an orphan desaturase for human plasmalogen synthesis.  
1232 *Science* *366*, 128–132.
- 1233 Gao, J., Ajjawi, I., Manoli, A., Sawin, A., Xu, C., Froehlich, J.E., Last, R.L., and Benning, C.  
1234 (2009). FATTY ACID DESATURASE4 of Arabidopsis encodes a protein distinct from  
1235 characterized fatty acid desaturases. *Plant J.* *60*, 832–839.

- 1236 Garraway, L.A., Widlund, H.R., Rubin, M.A., Getz, G., Berger, A.J., Ramaswamy, S.,  
1237 Beroukhim, R., Milner, D.A., Granter, S.R., Du, J., et al. (2005). Integrative genomic analyses  
1238 identify MITF as a lineage survival oncogene amplified in malignant melanoma. *Nature* 436,  
1239 117–122.
- 1240 Guna, A., Volkmar, N., Christianson, J.C., and Hegde, R.S. (2018). The ER membrane protein  
1241 complex is a transmembrane domain insertase. *Science* 359, 470–473.
- 1242  
1243 Haghverdi, L., Buettner, F., and Theis, F.J. (2015). Diffusion maps for high-dimensional single-  
1244 cell analysis of differentiation data. *Bioinformatics* 31, 2989–2998.
- 1245 Han, K., Jeng, E.E., Hess, G.T., Morgens, D.W., Li, A., and Bassik, M.C. (2017). Synergistic  
1246 drug combinations for cancer identified in a CRISPR screen for pairwise genetic interactions.  
1247 *Nat. Biotechnol.* 35, 463–474.
- 1248 Harris, M.L., Baxter, L.L., Loftus, S.K., and Pavan, W.J. (2010). Sox proteins in melanocyte  
1249 development and melanoma. *Pigment Cell Melanoma Res.* 23, 496–513.
- 1250 Harrow, J., Frankish, A., Gonzalez, J.M., Tapanari, E., Diekhans, M., Kokocinski, F., Aken, B.L.,  
1251 Barrell, D., Zadissa, A., Searle, S., et al. (2012). GENCODE: the reference human genome  
1252 annotation for The ENCODE Project. *Genome Res.* 22, 1760–1774.
- 1253 Hartwell, L.H., Hopfield, J.J., Leibler, S., and Murray, A.W. (1999). From molecular to modular  
1254 cell biology. *Nature* 402, C47–C52.
- 1255 Horlbeck, M.A., Xu, A., Wang, M., Bennett, N.K., Park, C.Y., Bogdanoff, D., Adamson, B.,  
1256 Chow, E.D., Kampmann, M., Peterson, T.R., et al. (2018). Mapping the Genetic Landscape of  
1257 Human Cells. *Cell* 174, 953–967.e22.
- 1258 Kang, Y., Baker, M.J., Liem, M., Louber, J., McKenzie, M., Atukorala, I., Ang, C.-S.,

- 1259 Keerthikumar, S., Mathivanan, S., and Stojanovski, D. (2016). Tim29 is a novel subunit of the  
1260 human TIM22 translocase and is involved in complex assembly and stability. *Elife* 5.
- 1261 Kim, E., Dede, M., Lenoir, W.F., Wang, G., Srinivasan, S., Colic, M., and Hart, T. (2019). A  
1262 network of human functional gene interactions from knockout fitness screens in cancer cells.  
1263 *Life Sci Alliance* 2.
- 1264 Kramer, M., Dutkowski, J., Yu, M., Bafna, V., and Ideker, T. (2014). Inferring gene ontologies  
1265 from pairwise similarity data. *Bioinformatics* 30, i34–i42.
- 1266 Li, M.-T., Di, W., Xu, H., Yang, Y.-K., Chen, H.-W., Zhang, F.-X., Zhai, Z.-H., and Chen, D.-Y.  
1267 (2013). Negative regulation of RIG-I-mediated innate antiviral signaling by SEC14L1. *J. Virol.*  
1268 87, 10037–10046.
- 1269 Liu, Y., and Xie, J. (2019). Cauchy Combination Test: A Powerful Test With Analytic p-Value  
1270 Calculation Under Arbitrary Dependency Structures. *Journal of the American Statistical*  
1271 *Association* 1–18.
- 1272 Liu, Y., Chen, S., Li, Z., Morrison, A.C., Boerwinkle, E., and Lin, X. (2019). ACAT: A Fast and  
1273 Powerful p Value Combination Method for Rare-Variant Analysis in Sequencing Studies. *The*  
1274 *American Journal of Human Genetics* 104, 410–421.
- 1275 McDonald, E.R., 3rd, de Weck, A., Schlabach, M.R., Billy, E., Mavrakis, K.J., Hoffman, G.R.,  
1276 Belur, D., Castelletti, D., Frias, E., Gampa, K., et al. (2017). Project DRIVE: A Compendium of  
1277 Cancer Dependencies and Synthetic Lethal Relationships Uncovered by Large-Scale, Deep  
1278 RNAi Screening. *Cell* 170, 577–592.e10.
- 1279 McInnes, L., Healy, J., Saul, N., and Großberger, L. (2018). UMAP: Uniform Manifold  
1280 Approximation and Projection. *Journal of Open Source Software* 3, 861.

- 1281 Meyers, R.M., Bryan, J.G., McFarland, J.M., Weir, B.A., Sizemore, A.E., Xu, H., Dharia, N.V.,  
1282 Montgomery, P.G., Cowley, G.S., Pantel, S., et al. (2017). Computational correction of copy  
1283 number effect improves specificity of CRISPR-Cas9 essentiality screens in cancer cells. *Nat.*  
1284 *Genet.* 49, 1779–1784.
- 1285 Mohr, S.E., Smith, J.A., Shamu, C.E., Neumüller, R.A., and Perrimon, N. (2014). RNAi  
1286 screening comes of age: improved techniques and complementary approaches. *Nat. Rev. Mol.*  
1287 *Cell Biol.* 15, 591–600.
- 1288 Moll, U.M., and Petrenko, O. (2003). The MDM2-p53 Interaction. *Mol. Cancer Res.* 1, 1001–  
1289 1008.
- 1290 Motley, A., Bright, N.A., Seaman, M.N.J., and Robinson, M.S. (2003). Clathrin-mediated  
1291 endocytosis in AP-2-depleted cells. *J. Cell Biol.* 162, 909–918.
- 1292 Nagan, N., and Zoeller, R.A. (2001). Plasmalogens: biosynthesis and functions. *Prog. Lipid Res.*  
1293 40, 199–229.
- 1294 Nepusz, T., Yu, H., and Paccanaro, A. (2012). Detecting overlapping protein complexes in  
1295 protein-protein interaction networks. *Nat. Methods* 9, 471–472.
- 1296 Okamura, Y., Aoki, Y., Obayashi, T., Tadaka, S., Ito, S., Narise, T., and Kinoshita, K. (2015).  
1297 COXPRESdb in 2015: coexpression database for animal species by DNA-microarray and  
1298 RNAseq-based expression data with multiple quality assessment systems. *Nucleic Acids Res.*  
1299 43, D82–D86.
- 1300 Pan, J., Meyers, R.M., Michel, B.C., Mashtalir, N., Sizemore, A.E., Wells, J.N., Cassel, S.H.,  
1301 Vazquez, F., Weir, B.A., Hahn, W.C., et al. (2018). Interrogation of Mammalian Protein Complex  
1302 Structure, Function, and Membership Using Genome-Scale Fitness Screens. *Cell Syst* 6, 555–  
1303 568.e7.

- 1304 Perotti, V., Baldassari, P., Molla, A., Vegetti, C., Bersani, I., Maurichi, A., Santinami, M.,  
1305 Anichini, A., and Mortarini, R. (2016). NFATc2 is an intrinsic regulator of melanoma  
1306 dedifferentiation. *Oncogene* 35, 2862–2872.
- 1307 Piano, V., Benjamin, D.I., Valente, S., Nenci, S., Marrocco, B., Mai, A., Aliverti, A., Nomura,  
1308 D.K., and Mattevi, A. (2015). Discovery of Inhibitors for the Ether Lipid-Generating Enzyme  
1309 AGPS as Anti-Cancer Agents. *ACS Chem. Biol.* 10, 2589–2597.
- 1310 Povey, S., Lovering, R., Bruford, E., Wright, M., Lush, M., and Wain, H. (2001). The HUGO  
1311 Gene Nomenclature Committee (HGNC). *Human Genetics* 109, 678–680.
- 1312 Raudvere, U., Kolberg, L., Kuzmin, I., Arak, T., Adler, P., Peterson, H., and Vilo, J. (2019).  
1313 g:Profiler: a web server for functional enrichment analysis and conversions of gene lists (2019  
1314 update). *Nucleic Acids Research* 47, W191–W198.
- 1315 Rauscher, B., Heigwer, F., Henkel, L., Hielscher, T., Voloshanenko, O., and Boutros, M. (2018).  
1316 Toward an integrated map of genetic interactions in cancer cells. *Mol. Syst. Biol.* 14, e7656.
- 1317 Ricke, R.M., van Ree, J.H., and van Deursen, J.M. (2008). Whole chromosome instability and  
1318 cancer: a complex relationship. *Trends Genet.* 24, 457–466.
- 1319 Rickman, D.S., Schulte, J.H., and Eilers, M. (2018). The Expanding World of N-MYC–Driven  
1320 Tumors. *Cancer Discov.* 8, 150–163.
- 1321 Roman, S.D., Ormandy, C.J., Manning, D.L., Blamey, R.W., Nicholson, R.I., Sutherland, R.L.,  
1322 and Clarke, C.L. (1993). Estradiol induction of retinoic acid receptors in human breast cancer  
1323 cells. *Cancer Res.* 53, 5940–5945.
- 1324 Rosenbluh, J., Mercer, J., Shrestha, Y., Oliver, R., Tamayo, P., Doench, J.G., Tirosh, I.,  
1325 Piccioni, F., Hartenian, E., Horn, H., et al. (2016). Genetic and Proteomic Interrogation of Lower

- 1326 Confidence Candidate Genes Reveals Signaling Networks in  $\beta$ -Catenin-Active Cancers. *Cell*  
1327 *Syst* 3, 302–316.e4.
- 1328 Ruepp, A., Brauner, B., Dunger-Kaltenbach, I., Frishman, G., Montrone, C., Stransky, M.,  
1329 Waegelé, B., Schmidt, T., Doudieu, O.N., Stümpflen, V., et al. (2008). CORUM: the  
1330 comprehensive resource of mammalian protein complexes. *Nucleic Acids Res.* 36, D646–D650.
- 1331 Saito, K., Tautz, L., and Mustelin, T. (2007). The lipid-binding SEC14 domain. *Biochim. Biophys.*  
1332 *Acta* 1771, 719–726.
- 1333 Saxton, R.A., and Sabatini, D.M. (2017). mTOR Signaling in Growth, Metabolism, and Disease.  
1334 *Cell* 169, 361–371.
- 1335 Schüssler-Fiorenza Rose, S.M., Contrepois, K., Moneghetti, K.J., Zhou, W., Mishra, T.,  
1336 Mataraso, S., Dagan-Rosenfeld, O., Ganz, A.B., Dunn, J., Hornburg, D., et al. (2019). A  
1337 longitudinal big data approach for precision health. *Nat. Med.* 25, 792–804.
- 1338 Shalem, O., Sanjana, N.E., and Zhang, F. (2015). High-throughput functional genomics using  
1339 CRISPR–Cas9. *Nat. Rev. Genet.* 16, 299–311.
- 1340 Shen, J.P., Zhao, D., Sasik, R., Luebeck, J., Birmingham, A., Bojorquez-Gomez, A., Licon, K.,  
1341 Klepper, K., Pekin, D., Beckett, A.N., et al. (2017). Combinatorial CRISPR–Cas9 screens for de  
1342 novo mapping of genetic interactions. *Nat. Methods* 14, 573–576.
- 1343 Shoemaker, C.J., Huang, T.Q., Weir, N.R., Polyakov, N.J., Schultz, S.W., and Denic, V. (2019).  
1344 CRISPR screening using an expanded toolkit of autophagy reporters identifies TMEM41B as a  
1345 novel autophagy factor. *PLoS Biol.* 17, e2007044.
- 1346 Shurtleff, M.J., Itzhak, D.N., Hussmann, J.A., Schirle Oakdale, N.T., Costa, E.A., Jonikas, M.,  
1347 Weibezahn, J., Popova, K.D., Jan, C.H., Sinitcyn, P., et al. (2018). The ER membrane protein

- 1348 complex interacts cotranslationally to enable biogenesis of multipass membrane proteins. *Elife*  
1349 7.
- 1350 Snyder, F., Lee, T.-C., and Wykle, R.L. (1985). Ether-Linked Glycerolipids and Their Bioactive  
1351 Species: Enzymes and Metabolic Regulation. In *The Enzymes of Biological Membranes: Volume*  
1352 *2 Biosynthesis and Metabolism*, A.N. Martonosi, ed. (Boston, MA: Springer US), pp. 1–58.
- 1353 Storey, J.D., and Tibshirani, R. (2003). Statistical significance for genomewide studies. *Proc.*  
1354 *Natl. Acad. Sci. U. S. A.* 100, 9440–9445.
- 1355 Stroud, D.A., Surgenor, E.E., Formosa, L.E., Reljic, B., Frazier, A.E., Dibley, M.G., Osellame,  
1356 L.D., Stait, T., Beilharz, T.H., Thorburn, D.R., et al. (2016). Accessory subunits are integral for  
1357 assembly and function of human mitochondrial complex I. *Nature* 538, 123–126.
- 1358 Stuart, J.M., Segal, E., Koller, D., and Kim, S.K. (2003). A gene-coexpression network for global  
1359 discovery of conserved genetic modules. *Science* 302, 249–255.
- 1360 Szklarczyk, D., Morris, J.H., Cook, H., Kuhn, M., Wyder, S., Simonovic, M., Santos, A.,  
1361 Doncheva, N.T., Roth, A., Bork, P., et al. (2017). The STRING database in 2017: quality-  
1362 controlled protein-protein association networks, made broadly accessible. *Nucleic Acids Res.*  
1363 45, D362–D368.
- 1364 Szolderits, G., Daum, G., Paltauf, F., and Hermetter, A. (1991). Protein-catalyzed transport of  
1365 ether phospholipids. *Biochim. Biophys. Acta* 1063, 197–202.
- 1366 Talbot, B.E., Vandorpe, D.H., Stotter, B.R., Alper, S.L., and Schlondorff, J.S. (2019).  
1367 Transmembrane insertases and N-glycosylation critically determine synthesis, trafficking, and  
1368 activity of the nonselective cation channel TRPC6. *J. Biol. Chem.* 294, 12655–12669.
- 1369 The Gene Ontology Consortium (2017). Expansion of the Gene Ontology knowledgebase and

- 1370 resources. *Nucleic Acids Res.* *45*, D331–D338.
- 1371 Thomson, T.M., Lozano, J.J., Loukili, N., Carrió, R., Serras, F., Cormand, B., Valeri, M., Díaz,  
1372 V.M., Abril, J., Burset, M., et al. (2000). Fusion of the human gene for the polyubiquitination  
1373 coeffector UEV1 with Kua, a newly identified gene. *Genome Res.* *10*, 1743–1756.
- 1374 Tian, S., Wu, Q., Zhou, B., Choi, M.Y., Ding, B., Yang, W., and Dong, M. (2019). Proteomic  
1375 Analysis Identifies Membrane Proteins Dependent on the ER Membrane Protein Complex. *Cell*  
1376 *Reports* *28*, 2517–2526.e5.
- 1377 Tong, A.H.Y. (2004). Global Mapping of the Yeast Genetic Interaction Network. *Science* *303*,  
1378 808–813.
- 1379 Tong, A.H., Evangelista, M., Parsons, A.B., Xu, H., Bader, G.D., Pagé, N., Robinson, M.,  
1380 Raghbizadeh, S., Hogue, C.W., Bussey, H., et al. (2001). Systematic genetic analysis with  
1381 ordered arrays of yeast deletion mutants. *Science* *294*, 2364–2368.
- 1382 Tsherniak, A., Vazquez, F., Montgomery, P.G., Weir, B.A., Kryukov, G., Cowley, G.S., Gill, S.,  
1383 Harrington, W.F., Pantel, S., Krill-Burger, J.M., et al. (2017). Defining a Cancer Dependency  
1384 Map. *Cell* *170*, 564–576.e16.
- 1385 Volkmar, N., Thezenas, M.-L., Louie, S.M., Juszkievicz, S., Nomura, D.K., Hegde, R.S.,  
1386 Kessler, B.M., and Christianson, J.C. (2019). The ER membrane protein complex promotes  
1387 biogenesis of sterol-related enzymes maintaining cholesterol homeostasis. *J. Cell Sci.* *132*.
- 1388 Wang, T., Yu, H., Hughes, N.W., Liu, B., Kendirli, A., Klein, K., Chen, W.W., Lander, E.S., and  
1389 Sabatini, D.M. (2017). Gene Essentiality Profiling Reveals Gene Networks and Synthetic Lethal  
1390 Interactions with Oncogenic Ras. *Cell* *168*, 890–903.e15.
- 1391 Wang, X., Li, G., Koul, S., Ohki, R., Maurer, M., Borczuk, A., and Halmos, B. (2018). PHLDA2 is



- 1392 a key oncogene-induced negative feedback inhibitor of EGFR/ErbB2 signaling via interference  
1393 with AKT signaling. *Oncotarget* 9, 24914.
- 1394 Xu, X., Xu, L., Gao, F., Wang, J., Ye, J., Zhou, M., Zhu, Y., and Tao, L. (2014). Identification of  
1395 a novel gene fusion (BMX-ARHGAP) in gastric cardia adenocarcinoma. *Diagn. Pathol.* 9, 218.
- 1396 Yu, J., Pressoir, G., Briggs, W.H., Vroh Bi, I., Yamasaki, M., Doebley, J.F., McMullen, M.D.,  
1397 Gaut, B.S., Nielsen, D.M., Holland, J.B., et al. (2006). A unified mixed-model method for  
1398 association mapping that accounts for multiple levels of relatedness. *Nat. Genet.* 38, 203–208.
- 1399 Zhang, Y.-W., Nasto, R.E., Varghese, R., Jablonski, S.A., Serebriiskii, I.G., Surana, R., Calvert,  
1400 V.S., Bebu, I., Murray, J., Jin, L., et al. (2016). Acquisition of estrogen independence induces  
1401 TOB1-related mechanisms supporting breast cancer cell proliferation. *Oncogene* 35, 1643–  
1402 1656.
- 1403 Zhu, C., Wu, L., Lv, Y., Guan, J., Bai, X., Lin, J., Liu, T., Yang, X., Robson, S.C., Sang, X., et al.  
1404 (2019). The fusion landscape of hepatocellular carcinoma. *Mol. Oncol.* 13, 1214–1225.
- 1405 Zoeller, R.A., Rangaswamy, S., Herscovitz, H., Rizzo, W.B., Hajra, A.K., Das, A.K., Moser,  
1406 H.W., Moser, A., Lazarow, P.B., and Santos, M.J. (1992). Mutants in a macrophage-like cell line  
1407 are defective in plasmalogen biosynthesis, but contain functional peroxisomes. *J. Biol. Chem.*  
1408 267, 8299–8306.

## SUPPLEMENTAL INFORMATION

Figure S1, related to Figure 1

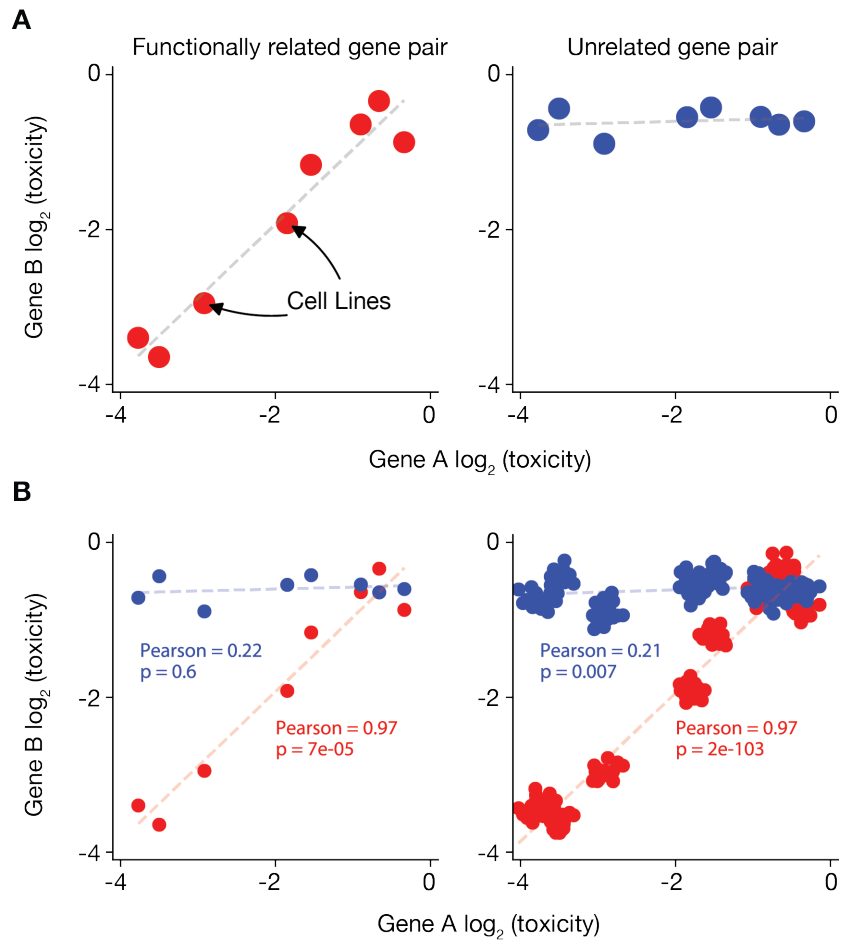

### **Figure S1: Co-essentiality profiling and the limitations of Pearson correlation**

(A) The concept of co-essentiality: (left) a pair of functionally related genes are both essential in some cell lines and both non-essential in other lines. Essentiality can be quantified from CRISPR screens as the logarithm of the growth effect of the gene's knockout (intuitively, the number of times fewer cells with the knockout doubled during the screen, compared to control cells). (Right) a pair of unrelated genes have uncorrelated essentiality across cell lines.

(B) Simulation of how biological relatedness between cell lines inflates Pearson correlation  $p$ -values. Duplicating each point 10 times with slight noise (analogous to duplicating each screen in 10 related lines) makes the previously non-significant ( $p = 0.6$ ) blue correlation highly significant ( $p = 0.007$ ) and the significant red correlation ( $p = 7 \times 10^{-5}$ ) substantially more so ( $p = 2 \times 10^{-103}$ ), despite similar correlation magnitudes.

**Figure S2, Related to Figure 2**

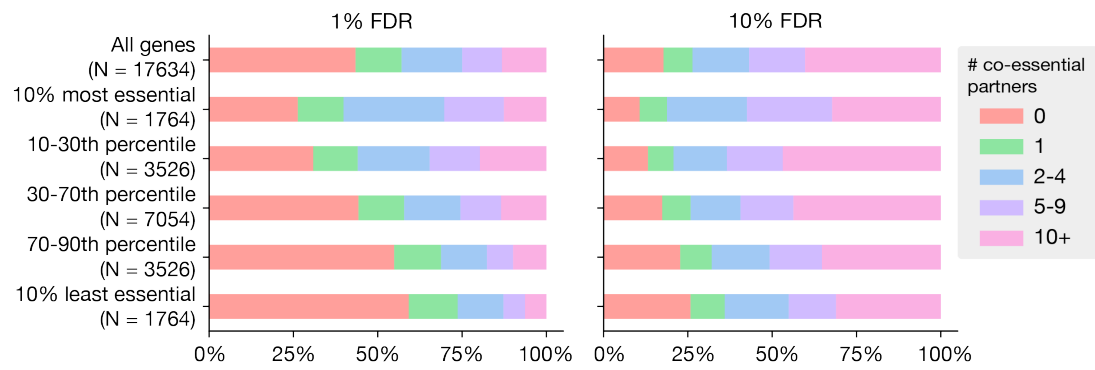

**Figure S2: Number of co-essential partners per gene by average gene essentiality**

Number of co-essential partners at 1% and 10% FDR as a function of a gene's average essentiality (pre-bias-correction CERES score) across lines.

**Figure S3, Related to Figure 2**

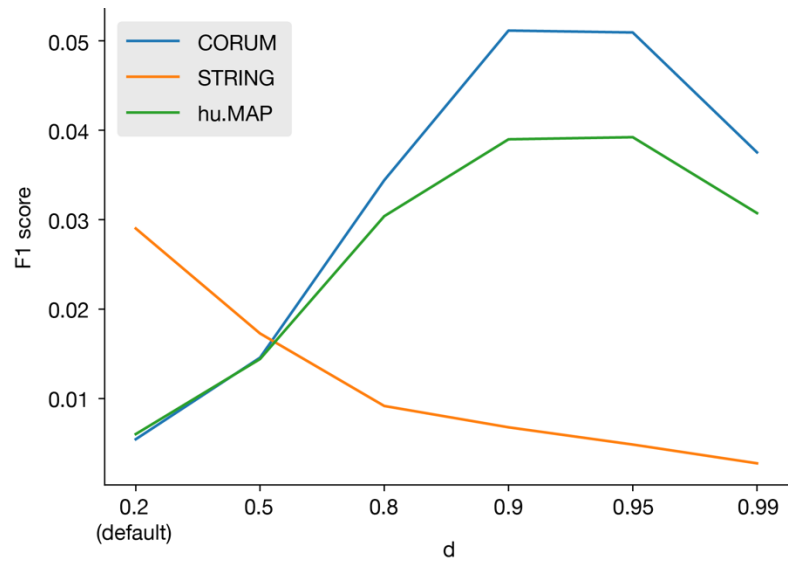

### **Figure S3: Benchmarking of cluster density $d$**

F1 score (harmonic mean of precision and recall) for various values of the module density parameter  $d$  on CORUM, hu.MAP and STRING. F1 scores represent the performance of a binary network based on the modules (i.e. “are genes A and B in the same module?”) at predicting a binary network based on the benchmark dataset (i.e. “are genes A and B partners in the benchmark dataset?”).

## Figure S4, Related to Figure 4

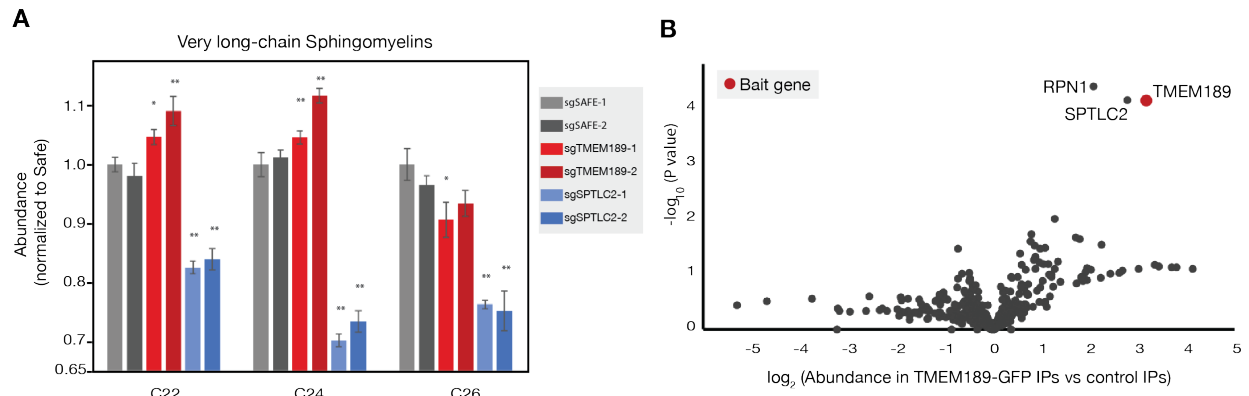



**Figure S4: Additional functional characterization of *TMEM189* suggests a secondary role in sphingolipid biosynthesis**

(A) Abundances (relative to Safe-targeting sgRNA control #1) of very long chain sphingomyelin species (with acyl chain length indicated on x-axis) in cell extracts prepared from HeLa cells transduced with indicated sgRNAs. sgSafe data and sgTMEM189 data are from same data set represented in Figure 4C. Error bars represent standard deviation (n = 4 technical replicates, two-tailed Student's t-test, \*, p<.05; \*\*p<.01).

(B) Volcano plot of mass spectrometric (TMT) analysis of TMEM189-GFP immunoprecipitates. Data are from same mass spectrometry analysis as data shown in Figure 4D.

Figure S5, Related to Figure 6

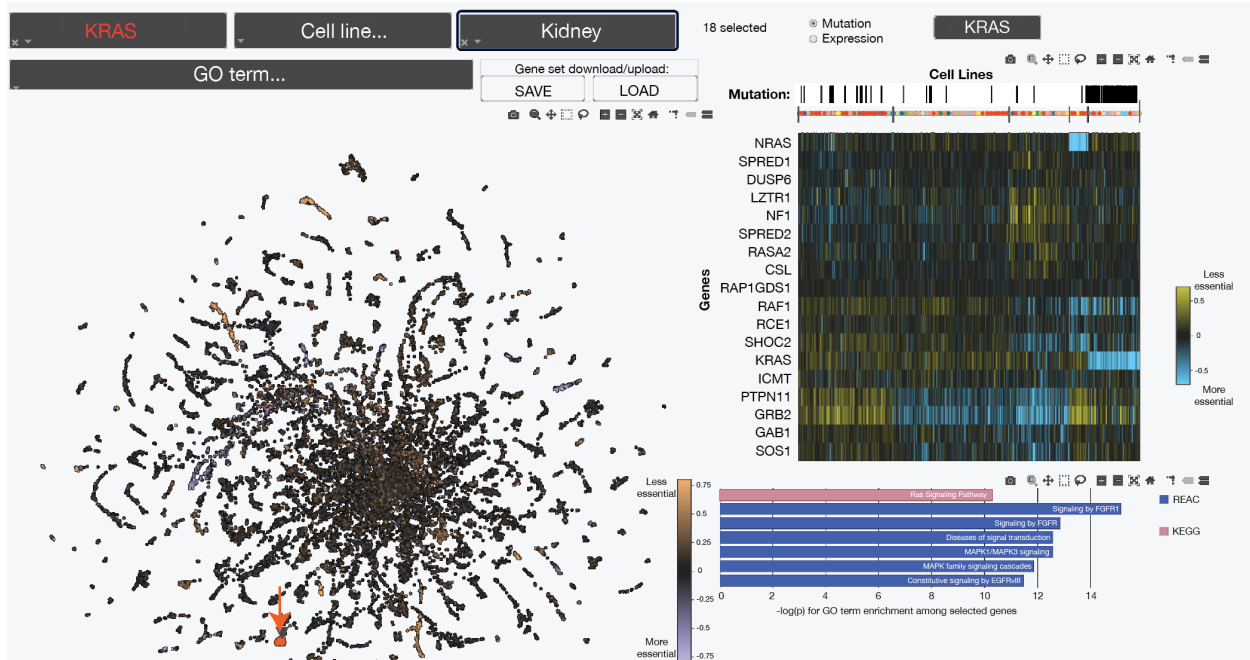

### **Figure S5: A web tool for interactive exploration of the co-essential network**

Example use case for the interactive web tool (coessentiality.net). A gene, *KRAS*, was selected using the dropdown menu at top left and is marked with a red arrow in the scatterplot below. Genes selected for analysis – *KRAS* and its gene neighborhood – are designated with red points in the main panel (left). The heatmap panel (top right) shows that *KRAS*-mutant lines (selected for display using the search bar above the heat map and indicated as black marks in the “Mutation” bar above the heatmap) are enriched in a cluster (far right) that is marked by increased essentiality of *KRAS*. The pathway enrichment panel (bottom right) shows strong enrichments for Ras signaling and related pathways. The points in the main panel have also been selected in the tissue search bar (top middle) to be colored according to the average essentialities of each gene in kidney-derived cell lines. Gene sets can also be either saved or uploaded as csv files using the respective buttons in the top center (under “Gene set download/upload”). Some web colors and font sizes were optimized for display in this figure.

**Figure S6, Related to Figure 2**

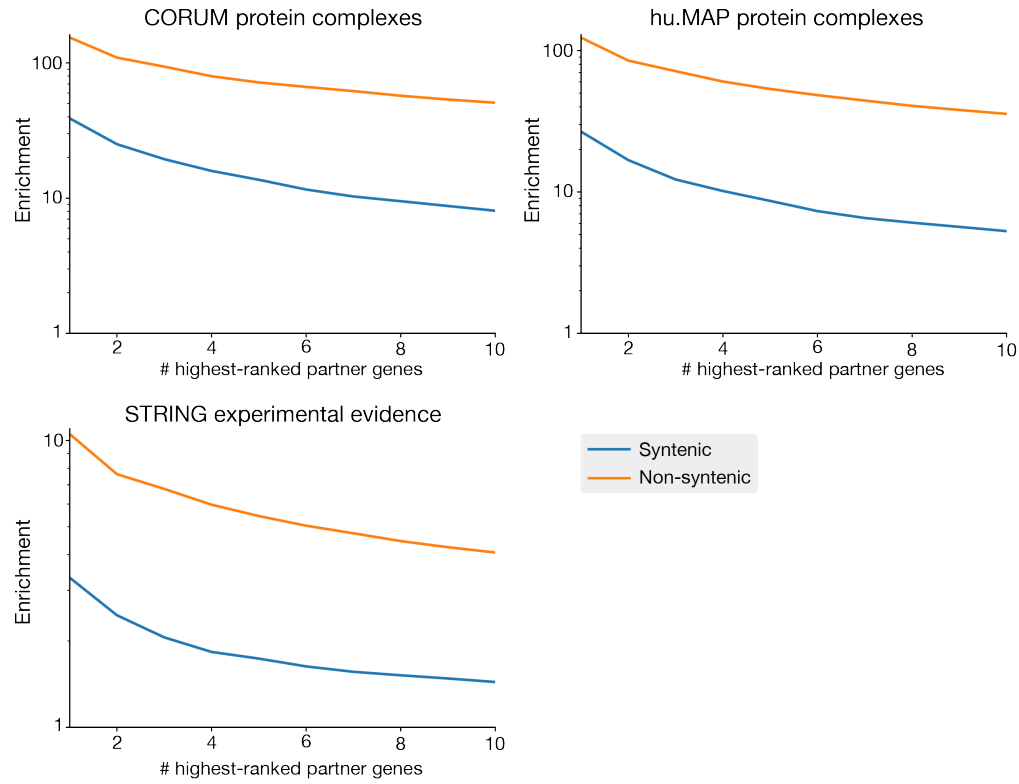

### **Figure S6: Benchmarking of syntenic versus non-syntenic modules**

Enrichment of syntenic (both genes on same chromosome) and non-syntenic co-essential pairs for annotated interactions CORUM, hu.MAP and STRING databases, using the same benchmarking strategy as in Figure 2.

**Figure S7, Related to Figure 2**

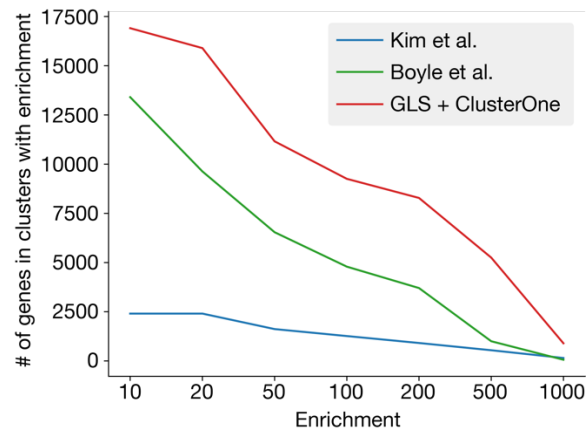

**Figure S7: Number of genes assigned putative functions by various co-essentiality module detection methods, after excluding syntenic modules.**

Number of genes in non-syntenic clusters/modules at least N-fold enriched for some GO term, excluding the gene itself from the enrichment calculation, for various N from 10 to 1000.

**Table S1: Spreadsheet of significant co-essential interactions at 10% per-gene FDR.**

List of all co-essential gene pairs identified in this study, with the number of Pubmed citations (as of Oct 2019) and chromosome location for each gene, and the direction of the gene correlation (positive (+) or negative (-)).

**Table S2: Co-essential and co-expressed partners of *TP53*, *KRAS* and *BRCA1*.**

| Gene         | Significant co-essential partners ( <i>p</i> -value, direction) |                     |   | Top co-expressed partners (correlation) |              |
|--------------|-----------------------------------------------------------------|---------------------|---|-----------------------------------------|--------------|
| <i>TP53</i>  | <b><i>USP28</i></b>                                             | $3 \times 10^{-28}$ | + | <b><i>CPEB4</i></b>                     | <b>-0.32</b> |
|              | <b><i>CDKN1A</i></b>                                            | $1 \times 10^{-24}$ | + | <i>SYNJ1</i>                            | -0.32        |
|              | <b><i>TP53BP1</i></b>                                           | $5 \times 10^{-23}$ | + | <i>PFN1</i>                             | 0.32         |
|              | <b><i>MDM2</i></b>                                              | $4 \times 10^{-18}$ | - | <i>RNPEP</i>                            | 0.31         |
|              | <b><i>CHEK2</i></b>                                             | $2 \times 10^{-16}$ | + | <b><i>RCC2</i></b>                      | <b>0.31</b>  |
|              | <b><i>ATM</i></b>                                               | $1 \times 10^{-14}$ | + | <i>CNN2</i>                             | 0.30         |
|              | <b><i>PPM1D</i></b>                                             | $2 \times 10^{-9}$  | - | <i>SERINC1</i>                          | -0.30        |
|              | <i>XPO7</i>                                                     | $6 \times 10^{-8}$  | + | <i>FAM126B</i>                          | -0.30        |
|              | <b><i>UBE2K</i></b>                                             | $9 \times 10^{-6}$  | + | <b><i>FOXM1</i></b>                     | <b>0.30</b>  |
|              | <i>CNOT2</i>                                                    | $1 \times 10^{-5}$  | - | <i>CHST14</i>                           | 0.30         |
| <i>KRAS</i>  | <b><i>RAF1</i></b>                                              | $1 \times 10^{-12}$ | + | <i>ZDHHC20</i>                          | 0.55         |
|              | <b><i>DOCK5</i></b>                                             | $4 \times 10^{-7}$  | + | <i>PTAR1</i>                            | 0.49         |
|              | <b><i>SHOC2</i></b>                                             | $2 \times 10^{-6}$  | + | <i>MATR3</i>                            | 0.49         |
|              | <i>ERGIC2</i>                                                   | $4 \times 10^{-6}$  | + | <i>SPCS3</i>                            | 0.47         |
|              | <i>TM7SF3</i>                                                   | $8 \times 10^{-6}$  | + | <i>SUZ12</i>                            | 0.47         |
| <i>BRCA1</i> | <b><i>BARD1</i></b>                                             | $1 \times 10^{-25}$ | + | <i>KIF14</i>                            | 0.67         |
|              | <b><i>PALB2</i></b>                                             | $2 \times 10^{-8}$  | + | <i>MCM10</i>                            | 0.65         |
|              | <i>RPL21</i>                                                    | $1 \times 10^{-6}$  | - | <i>KIF11</i>                            | 0.63         |
|              | <b><i>BRCA2</i></b>                                             | $2 \times 10^{-5}$  | + | <b><i>FANCD2</i></b>                    | <b>0.63</b>  |
|              | <i>HIST2H2AA3</i>                                               | $4 \times 10^{-5}$  | - | <i>NCAPH</i>                            | 0.62         |
|              | <i>HEY1</i>                                                     | $6 \times 10^{-5}$  | + | <i>ARHGAP11A</i>                        | 0.62         |

Significant GLS co-essential versus top co-expressed partners of *TP53*, *KRAS* and *BRCA1*.

Genes in bold have strong evidence of being part of the same pathway.



**Table S3: Spreadsheet of co-essential modules.**

List of all 5,228 co-essential modules and their constituent genes, with top 3 most-enriched gene ontology terms and their associated enrichments and  $p$ -values, the value of  $d$  used to define the module, and a link to the heatmap of batch-corrected essentiality data across 485 cell lines.

**Table S4: Uncharacterized gene functional predictions.**

List of uncharacterized genes that are present in co-essential modules >100-fold enriched for a gene ontology term, the Uniprot annotation score and number of Pubmed citations for each gene (as of Oct 2019), and the set of genes in each cluster that is and is not annotated with the most-enriched gene ontology term.

**Table S5: Lipidomics data.**

Lipid species concentrations for indicated lipids measured using Lipidyzer platform in indicated cell lines. QC1, QC2, and QC3 indicate quality controls (see Methods).

**Table S6: Mass spectrometry data for proteomic analysis of C15orf57 and TMEM189 interactomes.**

Proteomic data, including complete list of proteins and enrichment  $p$ -values, for C15orf57 and TMEM189 interactome analyses in Figures 4 and 5.

**Table S7: Cancer type-specific module dependencies.**

List of 444 differentially essential modules across 16 tissue types, ranked by  $p$ -value.

**Video S1: Example use cases of co-essential browser.**

Guide to use of co-essential browser showing how to navigate web tool in the context of multiple use cases, including gene lookup, gene set selection, and gene list upload.
